# Supplementary material for: Quantifying the relationship between SARS-CoV-2 viral load and infectiousness
Source: eLife. 2021 Sep 27;10:e69302. doi: 10.7554/eLife.69302 (PMC8476126; doi:10.7554/eLife.69302)
Supplement: Source data 1. [file elife-69302-data1.xlsx]

## Sheet: Sheet1
X	case_id	case_age	case_sex	case_earliest_date_symptoms	case_day0_VL	case_day0_swab_date	case_day3_VL	case_day3_swab_date	case_day7_VL	case_day7_swab_date	contact_id	contact_age	contact_sex	contact_category	mask_use	date_first_exposure	infected_contact	contact_earliest_date_symptoms	contact_day0_VL	contact_day0_swab_date	contact_OTHER_VL	contact_OTHER_swab_date	contact_day14_VL	contact_day14_swab_date
1	1	37	1	2020-03-11	8.16192	2020-03-19 00:00:00.0	5.28016	2020-03-22 00:00:00.0		2020-03-26 00:00:00.0	001-01	42	0	Household	999. Unknown	2020-03-14	0	2020-03-17 00:00:00.0		2020-03-18				2020-04-01 00:00:00.0
2	1	37	1	2020-03-11	8.16192	2020-03-19 00:00:00.0	5.28016	2020-03-22 00:00:00.0		2020-03-26 00:00:00.0	001-02	38	0	HCW	999. Unknown	2020-03-14	0			2020-03-18				2020-04-01 00:00:00.0
3	1	37	1	2020-03-11	8.16192	2020-03-19 00:00:00.0	5.28016	2020-03-22 00:00:00.0		2020-03-26 00:00:00.0	001-03	28	0	Household	999. Unknown	2020-03-14	0			2020-03-19				2020-04-02 00:00:00.0
4	1	37	1	2020-03-11	8.16192	2020-03-19 00:00:00.0	5.28016	2020-03-22 00:00:00.0		2020-03-26 00:00:00.0	001-04	29	1	HCW	999. Unknown	2020-03-14	0	2020-03-14 00:00:00.0		2020-03-18				2020-04-01 00:00:00.0
5	1	37	1	2020-03-11	8.16192	2020-03-19 00:00:00.0	5.28016	2020-03-22 00:00:00.0		2020-03-26 00:00:00.0	001-05	29	1	HCW	1. Always	2020-03-14	0	2020-03-23 00:00:00.0		2020-03-18				2020-04-01 00:00:00.0
6	1	37	1	2020-03-11	8.16192	2020-03-19 00:00:00.0	5.28016	2020-03-22 00:00:00.0		2020-03-26 00:00:00.0	001-06	39	0	HCW	1. Always	2020-03-14	0			2020-03-18				2020-04-01 00:00:00.0
7	1	37	1	2020-03-11	8.16192	2020-03-19 00:00:00.0	5.28016	2020-03-22 00:00:00.0		2020-03-26 00:00:00.0	001-07	43	0	HCW	999. Unknown	2020-03-14	0			2020-03-19				2020-04-02 00:00:00.0
8	1	37	1	2020-03-11	8.16192	2020-03-19 00:00:00.0	5.28016	2020-03-22 00:00:00.0		2020-03-26 00:00:00.0	001-08	33	0	HCW	999. Unknown	2020-03-14	0	2020-03-17 00:00:00.0		2020-03-18
9	1	37	1	2020-03-11	8.16192	2020-03-19 00:00:00.0	5.28016	2020-03-22 00:00:00.0		2020-03-26 00:00:00.0	001-09	42	0	Household	0. Never	2020-03-14	0			2020-03-18				2020-04-01 00:00:00.0
10	1	37	1	2020-03-11	8.16192	2020-03-19 00:00:00.0	5.28016	2020-03-22 00:00:00.0		2020-03-26 00:00:00.0	001-10	38	1	Household	0. Never	2020-03-14	0			2020-03-18				2020-04-01 00:00:00.0
11	1	37	1	2020-03-11	8.16192	2020-03-19 00:00:00.0	5.28016	2020-03-22 00:00:00.0		2020-03-26 00:00:00.0	001-12	60	1	HCW	999. Unknown	2020-03-14	0			2020-03-18				2020-04-01 00:00:00.0
12	1	37	1	2020-03-11	8.16192	2020-03-19 00:00:00.0	5.28016	2020-03-22 00:00:00.0		2020-03-26 00:00:00.0	001-13	42	1	Household	999. Unknown	2020-03-14	0			2020-03-18				2020-04-02 00:00:00.0
13	1	37	1	2020-03-11	8.16192	2020-03-19 00:00:00.0	5.28016	2020-03-22 00:00:00.0		2020-03-26 00:00:00.0	001-15	42	0	HCW	999. Unknown	2020-03-14	0			2020-03-18				2020-04-01 00:00:00.0
14	1	37	1	2020-03-11	8.16192	2020-03-19 00:00:00.0	5.28016	2020-03-22 00:00:00.0		2020-03-26 00:00:00.0	001-16	38	0	HCW	999. Unknown	2020-03-14	0			2020-03-19				2020-04-02 00:00:00.0
15	1	37	1	2020-03-11	8.16192	2020-03-19 00:00:00.0	5.28016	2020-03-22 00:00:00.0		2020-03-26 00:00:00.0	001-18	47	1	HCW	999. Unknown	2020-03-14	0			2020-03-18				2020-04-01 00:00:00.0
16	5	59	1	2020-03-13	8.38644	2020-03-18 00:00:00.0	7.53783	2020-03-21 00:00:00.0		2020-03-25 00:00:00.0	005-01	62	1	Household	0. Never	2020-03-18	1	2020-03-11 00:00:00.0	6.4512	2020-03-18			5.50096	2020-04-01 00:00:00.0
17	5	59	1	2020-03-13	8.38644	2020-03-18 00:00:00.0	7.53783	2020-03-21 00:00:00.0		2020-03-25 00:00:00.0	005-02	70	0	Household	0. Never	2020-03-18	1	2020-03-11 00:00:00.0	8.39709	2020-03-18			6.3259	2020-04-01 00:00:00.0
18	5	59	1	2020-03-13	8.38644	2020-03-18 00:00:00.0	7.53783	2020-03-21 00:00:00.0		2020-03-25 00:00:00.0	005-03	40	1	Household	0. Never	2020-03-18	0			2020-03-19				2020-04-02 00:00:00.0
19	5	59	1	2020-03-13	8.38644	2020-03-18 00:00:00.0	7.53783	2020-03-21 00:00:00.0		2020-03-25 00:00:00.0	005-04	35	0	Household	0. Never	2020-03-18	0	2020-03-16 00:00:00.0		2020-03-19				2020-04-02 00:00:00.0
20	6	40	0	2020-03-11	7.05102	2020-03-18 00:00:00.0	5.43716	2020-03-21 00:00:00.0		2020-03-25 00:00:00.0	006-01	43	0	Unknown	0. Never	2020-03-16	0			2020-03-18				2020-04-01 00:00:00.0
21	6	40	0	2020-03-11	7.05102	2020-03-18 00:00:00.0	5.43716	2020-03-21 00:00:00.0		2020-03-25 00:00:00.0	006-02	46	0	Unknown	0. Never	2020-03-16	0			2020-03-18				2020-04-01 00:00:00.0
22	7	25	0	2020-03-14	7.87787	2020-03-18 00:00:00.0	7.87787	2020-03-21 00:00:00.0		2020-03-25 00:00:00.0	007-01	25	1	Household	999. Unknown	2020-03-13	1		6.59038	2020-03-18
23	8	60	0	2020-03-14	6.53954	2020-03-19 00:00:00.0	5.78856	2020-03-22 00:00:00.0		2020-03-26 00:00:00.0	008-01	22	1	Household	0. Never	2020-03-13	0			2020-03-19				2020-04-02 00:00:00.0
24	8	60	0	2020-03-14	6.53954	2020-03-19 00:00:00.0	5.78856	2020-03-22 00:00:00.0		2020-03-26 00:00:00.0	008-04	52	1	HCW	1. Always	2020-04-15	0	2020-03-26 00:00:00.0		2020-03-20				2020-04-03 00:00:00.0
25	8	60	0	2020-03-14	6.53954	2020-03-19 00:00:00.0	5.78856	2020-03-22 00:00:00.0		2020-03-26 00:00:00.0	008-07	30	1	HCW	1. Always	2020-03-15	0	2020-03-21 00:00:00.0		2020-03-20		2020-04-06		2020-04-03 00:00:00.0
26	8	60	0	2020-03-14	6.53954	2020-03-19 00:00:00.0	5.78856	2020-03-22 00:00:00.0		2020-03-26 00:00:00.0	008-08	50	1	HCW	999. Unknown	2020-03-15	0			2020-03-20				2020-04-03 00:00:00.0
27	9	58	1	2020-03-16	9.34004	2020-03-19 00:00:00.0	7.97329	2020-03-22 00:00:00.0		2020-03-26 00:00:00.0	009-01	56	0	Household	999. Unknown	2020-03-16	1	2020-03-19 00:00:00.0	10.2342	2020-03-19
28	13	51	1		8.35027	2020-03-19 00:00:00.0	5.81258	2020-03-22 00:00:00.0		2020-03-26 00:00:00.0	013-01	52	0	Household	0. Never	2020-03-18	1	2020-03-25 00:00:00.0	5.05053	2020-03-19				2020-04-02 00:00:00.0
29	13	51	1		8.35027	2020-03-19 00:00:00.0	5.81258	2020-03-22 00:00:00.0		2020-03-26 00:00:00.0	013-02	62	1	HCW	1. Always	2020-03-16	0			2020-03-21				2020-04-03 00:00:00.0
30	13	51	1		8.35027	2020-03-19 00:00:00.0	5.81258	2020-03-22 00:00:00.0		2020-03-26 00:00:00.0	013-03	62	1	HCW	1. Always	2020-03-16	0			2020-03-20				2020-04-03 00:00:00.0
31	13	51	1		8.35027	2020-03-19 00:00:00.0	5.81258	2020-03-22 00:00:00.0		2020-03-26 00:00:00.0	013-04	47	1	HCW	1. Always	2020-03-16	0			2020-03-20				2020-04-03 00:00:00.0
32	13	51	1		8.35027	2020-03-19 00:00:00.0	5.81258	2020-03-22 00:00:00.0		2020-03-26 00:00:00.0	013-07	25	1	HCW	1. Always	2020-03-16	0	2020-03-27 00:00:00.0		2020-03-20				2020-04-03 00:00:00.0
33	13	51	1		8.35027	2020-03-19 00:00:00.0	5.81258	2020-03-22 00:00:00.0		2020-03-26 00:00:00.0	013-08	52	1	HCW	1. Always	2020-03-16	0			2020-03-20				2020-04-03 00:00:00.0
34	14	45	1	2020-03-15	5.43402	2020-03-20 00:00:00.0	7.30994	2020-03-23 00:00:00.0		2020-03-27 00:00:00.0	014-01	53	0	Household	0. Never	2020-03-19	0			2020-03-20				2020-04-03 00:00:00.0
35	14	45	1	2020-03-15	5.43402	2020-03-20 00:00:00.0	7.30994	2020-03-23 00:00:00.0		2020-03-27 00:00:00.0	014-02	48	0	Household	0. Never	2020-03-19	0	2020-03-22 00:00:00.0		2020-03-20				2020-04-03 00:00:00.0
36	14	45	1	2020-03-15	5.43402	2020-03-20 00:00:00.0	7.30994	2020-03-23 00:00:00.0		2020-03-27 00:00:00.0	014-05	33	1	HCW	1. Always	2020-03-19	0			2020-03-20				2020-04-03 00:00:00.0
37	15	42	1	2020-03-14	5.73486	2020-03-20 00:00:00.0	6.03458	2020-03-23 00:00:00.0		2020-03-27 00:00:00.0	015-01	57	1	HCW	999. Unknown	2020-03-17	1	2020-03-25 00:00:00.0		2020-03-21			4.51631	2020-04-04 00:00:00.0
38	15	42	1	2020-03-14	5.73486	2020-03-20 00:00:00.0	6.03458	2020-03-23 00:00:00.0		2020-03-27 00:00:00.0	015-02	45	0	Household	999. Unknown	2020-03-17	0	2020-03-28 00:00:00.0		2020-03-21				2020-04-04 00:00:00.0
39	15	42	1	2020-03-14	5.73486	2020-03-20 00:00:00.0	6.03458	2020-03-23 00:00:00.0		2020-03-27 00:00:00.0	015-03	60	1	HCW	999. Unknown	2020-03-17	0			2020-03-21				2020-04-04 00:00:00.0
40	15	42	1	2020-03-14	5.73486	2020-03-20 00:00:00.0	6.03458	2020-03-23 00:00:00.0		2020-03-27 00:00:00.0	015-04	34	1	HCW	999. Unknown	2020-03-17	0			2020-03-21				2020-04-04 00:00:00.0
41	15	42	1	2020-03-14	5.73486	2020-03-20 00:00:00.0	6.03458	2020-03-23 00:00:00.0		2020-03-27 00:00:00.0	015-05	49	0	Household	999. Unknown	2020-03-17	0			2020-03-21				2020-04-04 00:00:00.0
42	15	42	1	2020-03-14	5.73486	2020-03-20 00:00:00.0	6.03458	2020-03-23 00:00:00.0		2020-03-27 00:00:00.0	015-06	38	1	HCW	999. Unknown	2020-03-17	0			2020-03-21				2020-04-04 00:00:00.0
43	15	42	1	2020-03-14	5.73486	2020-03-20 00:00:00.0	6.03458	2020-03-23 00:00:00.0		2020-03-27 00:00:00.0	015-07	39	0	HCW	999. Unknown	2020-03-17	0	2020-03-27 00:00:00.0		2020-03-21				2020-04-04 00:00:00.0
44	16	20	0		9.50421	2020-03-19 00:00:00.0	4.75593	2020-03-22 00:00:00.0		2020-03-26 00:00:00.0	016-01	19	0	Household	999. Unknown	2020-03-14	0			2020-03-19				2020-04-02 00:00:00.0
45	16	20	0		9.50421	2020-03-19 00:00:00.0	4.75593	2020-03-22 00:00:00.0		2020-03-26 00:00:00.0	016-04	24	0	Household	999. Unknown	2020-03-14	0			2020-03-19				2020-04-02 00:00:00.0
46	16	20	0		9.50421	2020-03-19 00:00:00.0	4.75593	2020-03-22 00:00:00.0		2020-03-26 00:00:00.0	016-05	51	1	Household	999. Unknown	2020-03-14	0	2020-03-20 00:00:00.0		2020-03-19				2020-04-02 00:00:00.0
47	16	20	0		9.50421	2020-03-19 00:00:00.0	4.75593	2020-03-22 00:00:00.0		2020-03-26 00:00:00.0	016-06	23	1	Household	999. Unknown	2020-03-14	0			2020-03-19				2020-04-02 00:00:00.0
48	18	30	1	2020-03-14	8.72779	2020-03-20 00:00:00.0	5.17497	2020-03-23 00:00:00.0		2020-03-27 00:00:00.0	018-01	37	1	HCW	999. Unknown	2020-03-11	0			2020-03-19				2020-04-02 00:00:00.0
49	19	41	1	2020-03-13	10.8806	2020-03-19 00:00:00.0	8.58593	2020-03-22 00:00:00.0		2020-03-26 00:00:00.0	019-01		1	Household	999. Unknown	2020-03-13	0
50	19	41	1	2020-03-13	10.8806	2020-03-19 00:00:00.0	8.58593	2020-03-22 00:00:00.0		2020-03-26 00:00:00.0	019-02	42	1	Household	999. Unknown	2020-03-13	0	2020-03-23 00:00:00.0		2020-03-19				2020-04-04 00:00:00.0
51	21	51	0	2020-03-17	5.46797	2020-03-20 00:00:00.0	6.29929	2020-03-23 00:00:00.0		2020-03-27 00:00:00.0	021-01	44	1	Household	999. Unknown	2020-03-16	0			2020-03-20				2020-04-03 00:00:00.0
52	23	24	1	2020-03-16	8.22831	2020-03-20 00:00:00.0	7.52124	2020-03-23 00:00:00.0		2020-03-27 00:00:00.0	023-01	56	1	Household	999. Unknown	2020-03-20	0			2020-03-20				2020-04-03 00:00:00.0
53	24	39	1	2020-03-16	10.8559	2020-03-20 00:00:00.0	4.80488	2020-03-23 00:00:00.0		2020-03-27 00:00:00.0	024-01	66	1	Household	0. Never	2020-03-17	0	2020-03-24 00:00:00.0		2020-03-20				2020-04-03 00:00:00.0
54	24	39	1	2020-03-16	10.8559	2020-03-20 00:00:00.0	4.80488	2020-03-23 00:00:00.0		2020-03-27 00:00:00.0	024-03	59	1	HCW	0. Never	2020-03-16	1	2020-03-22 00:00:00.0	4.75433	2020-03-21	4.75433		4.38511	2020-04-04 00:00:00.0
55	25	45	1	2020-03-16	10.8942	2020-03-21 00:00:00.0	8.66	2020-03-24 00:00:00.0		2020-03-28 00:00:00.0	025-01	32	1	Household	999. Unknown	2020-03-17	1		5.04698	2020-03-21				2020-04-04 00:00:00.0
56	26	32	1	2020-03-13	5.02616	2020-03-21 00:00:00.0		2020-03-26 00:00:00.0		2020-03-28 00:00:00.0	026-01	27	0	Household	0. Never	2020-03-20	0			2020-03-21				2020-04-04 00:00:00.0
57	27	41	1	2020-03-16	7.77452	2020-03-21 00:00:00.0	6.13975	2020-03-24 00:00:00.0		2020-03-28 00:00:00.0	027-02	66	0	Household	999. Unknown	2020-03-17	0			2020-03-21				2020-04-04 00:00:00.0
58	27	41	1	2020-03-16	7.77452	2020-03-21 00:00:00.0	6.13975	2020-03-24 00:00:00.0		2020-03-28 00:00:00.0	027-04	45	0	Household	999. Unknown	2020-03-17	1		6.37413	2020-03-21			5.09146	2020-04-04 00:00:00.0
59	27	41	1	2020-03-16	7.77452	2020-03-21 00:00:00.0	6.13975	2020-03-24 00:00:00.0		2020-03-28 00:00:00.0	027-05	44	0	Household	999. Unknown	2020-03-17	0			2020-03-21				2020-04-04 00:00:00.0
60	28	41	0	2020-03-15	7.78025	2020-03-20 00:00:00.0	5.89513	2020-03-23 00:00:00.0		2020-03-27 00:00:00.0	028-01	36	0	Household	999. Unknown	2020-03-17	0	2020-03-20 00:00:00.0		2020-03-20
61	29	51	0	2020-03-16	8.70254	2020-03-21 00:00:00.0		2020-03-24 00:00:00.0		2020-03-29 00:00:00.0	029-02	33	0	Household	999. Unknown	2020-03-17	0			2020-03-21				2020-04-04 00:00:00.0
62	31	62	1	2020-03-18	7.0045	2020-03-21 00:00:00.0				2020-03-28 00:00:00.0	031-01	62	0	Household	999. Unknown	2020-03-11	0	2020-03-27 00:00:00.0		2020-03-21				2020-04-04 00:00:00.0
63	31	62	1	2020-03-18	7.0045	2020-03-21 00:00:00.0				2020-03-28 00:00:00.0	031-02	69	0	Household	1. Always	2020-03-17	1		6.42938	2020-03-21				2020-04-04 00:00:00.0
64	34	25	1	2020-03-15	10.0372	2020-03-21 00:00:00.0	6.35507	2020-03-24 00:00:00.0		2020-03-28 00:00:00.0	034-01	29	0	Household	0. Never	2020-03-16	0			2020-03-21				2020-04-04 00:00:00.0
65	35	48	0	2020-03-14	9.21919	2020-03-21 00:00:00.0	5.82751	2020-03-26 00:00:00.0		2020-03-28 00:00:00.0	035-01	46	1	Household	999. Unknown	2020-03-18	1		6.81927	2020-03-21				2020-04-05 00:00:00.0
66	35	48	0	2020-03-14	9.21919	2020-03-21 00:00:00.0	5.82751	2020-03-26 00:00:00.0		2020-03-28 00:00:00.0	035-03	39	0	HCW	1. Always		1	2020-03-26 00:00:00.0	7.38432	2020-03-21		2020-04-06		2020-04-04 00:00:00.0
67	37	43	1	2020-03-17	8.88604	2020-03-21 00:00:00.0	7.55703	2020-03-24 00:00:00.0		2020-03-28 00:00:00.0	037-01	46	0	Household	0. Never	2020-03-18	0			2020-03-21				2020-04-04 00:00:00.0
68	37	43	1	2020-03-17	8.88604	2020-03-21 00:00:00.0	7.55703	2020-03-24 00:00:00.0		2020-03-28 00:00:00.0	037-02	44	0	Household	0. Never	2020-03-18	0	2020-04-03 00:00:00.0		2020-03-21				2020-04-05 00:00:00.0
69	37	43	1	2020-03-17	8.88604	2020-03-21 00:00:00.0	7.55703	2020-03-24 00:00:00.0		2020-03-28 00:00:00.0	037-03	43	0	Household	0. Never	2020-03-19	0			2020-03-21				2020-04-05 00:00:00.0
70	40	27	0	2020-03-17	9.48096	2020-03-21 00:00:00.0	7.98483	2020-03-24 00:00:00.0		2020-03-28 00:00:00.0	040-01	24	0	Household	999. Unknown	2020-03-16	1		7.58177	2020-03-21				2020-04-04 00:00:00.0
71	40	27	0	2020-03-17	9.48096	2020-03-21 00:00:00.0	7.98483	2020-03-24 00:00:00.0		2020-03-28 00:00:00.0	040-02	24	0	Household	999. Unknown	2020-03-16	0			2020-03-21				2020-04-04 00:00:00.0
72	42	60	0	2020-03-18	11.0956	2020-03-22 00:00:00.0	6.22961	2020-03-25 00:00:00.0		2020-03-29 00:00:00.0	042-01	25	1	Household	999. Unknown	2020-03-18	1	2020-03-25 00:00:00.0	11.0295	2020-03-22	8.6756	2020-04-06		2020-04-05 00:00:00.0
73	42	60	0	2020-03-18	11.0956	2020-03-22 00:00:00.0	6.22961	2020-03-25 00:00:00.0		2020-03-29 00:00:00.0	042-02	29	0	Household	999. Unknown	2020-03-18	0			2020-03-22				2020-04-05 00:00:00.0
74	43	46	1	2020-03-15	8.51832	2020-03-22 00:00:00.0	6.25957	2020-03-30 00:00:00.0		2020-03-29 00:00:00.0	043-01	38	0	Household	0. Never	2020-03-21	0
75	43	46	1	2020-03-15	8.51832	2020-03-22 00:00:00.0	6.25957	2020-03-30 00:00:00.0		2020-03-29 00:00:00.0	043-02	47	1	HCW	1. Always		0			2020-03-22				2020-04-05 00:00:00.0
76	43	46	1	2020-03-15	8.51832	2020-03-22 00:00:00.0	6.25957	2020-03-30 00:00:00.0		2020-03-29 00:00:00.0	043-03	32	1	HCW	1. Always		0	2020-03-29 00:00:00.0		2020-03-23				2020-04-07 00:00:00.0
77	44	53	1	2020-03-16	9.42449	2020-03-22 00:00:00.0	7.65574	2020-03-25 00:00:00.0		2020-03-29 00:00:00.0	044-01	62	0	Household	0. Never	2020-03-19	1	2020-03-31 00:00:00.0		2020-03-22	10.2994	2020-04-08	9.9333	2020-04-05 00:00:00.0
78	45	48	0	2020-03-17	11.5084	2020-03-22 00:00:00.0	7.65734	2020-03-25 00:00:00.0		2020-03-29 00:00:00.0	045-01	47	1	Household	999. Unknown	2020-03-20	1	2020-03-21 00:00:00.0	9.56004	2020-03-22			6.68688	2020-04-05 00:00:00.0
79	46	62	0	2020-03-16	8.61516	2020-03-22 00:00:00.0	8.61516	2020-03-25 00:00:00.0		2020-03-29 00:00:00.0	046-01	57	1	Household	999. Unknown	2020-03-16	1	2020-03-22 00:00:00.0	9.77841	2020-03-22				2020-04-05 00:00:00.0
80	46	62	0	2020-03-16	8.61516	2020-03-22 00:00:00.0	8.61516	2020-03-25 00:00:00.0		2020-03-29 00:00:00.0	046-02	27	0	Household	999. Unknown	2020-03-16	1	2020-03-21 00:00:00.0	11.3874	2020-03-22			5.87106	2020-04-05 00:00:00.0
81	47	40	0	2020-03-18	8.835	2020-03-22 00:00:00.0					047-01	51	1	Household	999. Unknown	2020-03-17	1		10.6165	2020-03-22			7.78305	2020-04-05 00:00:00.0
82	47	40	0	2020-03-18	8.835	2020-03-22 00:00:00.0					047-02	37	1	Household	999. Unknown	2020-03-17	1			2020-03-22			6.2723	2020-04-05 00:00:00.0
83	47	40	0	2020-03-18	8.835	2020-03-22 00:00:00.0					047-03	53	1	HCW	999. Unknown	2020-03-17	0			2020-03-22				2020-04-05 00:00:00.0
84	47	40	0	2020-03-18	8.835	2020-03-22 00:00:00.0					047-04	27	1	HCW	1. Always	2020-03-17	0			2020-03-22				2020-04-05 00:00:00.0
85	47	40	0	2020-03-18	8.835	2020-03-22 00:00:00.0					047-06	37	0	HCW	1. Always	2020-03-17	0			2020-03-22				2020-04-05 00:00:00.0
86	48	34	1	2020-03-17	7.72534	2020-03-22 00:00:00.0	7.13585	2020-03-25 00:00:00.0		2020-03-29 00:00:00.0	048-01	41	0	HCW	999. Unknown	2020-03-17	0			2020-03-22				2020-04-05 00:00:00.0
87	48	34	1	2020-03-17	7.72534	2020-03-22 00:00:00.0	7.13585	2020-03-25 00:00:00.0		2020-03-29 00:00:00.0	048-02	48	0	HCW	999. Unknown	2020-03-17	0			2020-03-22				2020-04-05 00:00:00.0
88	48	34	1	2020-03-17	7.72534	2020-03-22 00:00:00.0	7.13585	2020-03-25 00:00:00.0		2020-03-29 00:00:00.0	048-03	48	1	HCW	999. Unknown	2020-03-17	1			2020-03-22			5.9062	2020-04-05 00:00:00.0
89	50	57	1	2020-03-19	10.6402	2020-03-22 00:00:00.0	8.13892	2020-03-25 00:00:00.0		2020-03-29 00:00:00.0	050-01	55	0	Household	999. Unknown	2020-03-19	0	2020-03-22 00:00:00.0		2020-03-22				2020-04-05 00:00:00.0
90	51	32	0	2020-03-18	8.8671	2020-03-22 00:00:00.0	7.123	2020-03-25 00:00:00.0		2020-03-29 00:00:00.0	051-01	31	1	Household	999. Unknown	2020-03-18	0	2020-03-22 00:00:00.0		2020-03-22				2020-04-05 00:00:00.0
91	52	50	1	2020-03-20	10.5812	2020-03-23 00:00:00.0	7.30873	2020-03-26 00:00:00.0		2020-03-30 00:00:00.0	052-01	20	0	Household	999. Unknown	2020-03-20	1	2020-03-23 00:00:00.0		2020-03-23			4.0757	2020-04-06 00:00:00.0
92	52	50	1	2020-03-20	10.5812	2020-03-23 00:00:00.0	7.30873	2020-03-26 00:00:00.0		2020-03-30 00:00:00.0	052-02	53	0	Household	999. Unknown	2020-03-20	0			2020-03-23				2020-04-06 00:00:00.0
93	53	39	1	2020-03-17	9.15631	2020-03-23 00:00:00.0	8.08562	2020-03-26 00:00:00.0		2020-03-30 00:00:00.0	053-02	39	0	HCW	1. Always		0			2020-03-23				2020-04-06 00:00:00.0
94	53	39	1	2020-03-17	9.15631	2020-03-23 00:00:00.0	8.08562	2020-03-26 00:00:00.0		2020-03-30 00:00:00.0	053-05	38	0	HCW	1. Always	2020-03-20	0			2020-03-23				2020-04-06 00:00:00.0
95	53	39	1	2020-03-17	9.15631	2020-03-23 00:00:00.0	8.08562	2020-03-26 00:00:00.0		2020-03-30 00:00:00.0	053-07	34	0	HCW	1. Always	2020-03-20	0			2020-03-23				2020-04-06 00:00:00.0
96	53	39	1	2020-03-17	9.15631	2020-03-23 00:00:00.0	8.08562	2020-03-26 00:00:00.0		2020-03-30 00:00:00.0	053-09	39	1	HCW	1. Always	2020-03-20	1		8.8093	2020-03-23				2020-04-06 00:00:00.0
97	54	59	0	2020-03-17	10.3051	2020-03-23 00:00:00.0	8.35047	2020-03-26 00:00:00.0		2020-03-30 00:00:00.0	054-01	20	1	Household	999. Unknown	2020-03-17	0			2020-03-23				2020-04-06 00:00:00.0
98	54	59	0	2020-03-17	10.3051	2020-03-23 00:00:00.0	8.35047	2020-03-26 00:00:00.0		2020-03-30 00:00:00.0	054-02	18	1	Household	0. Never	2020-03-17	0			2020-03-23				2020-04-06 00:00:00.0
99	54	59	0	2020-03-17	10.3051	2020-03-23 00:00:00.0	8.35047	2020-03-26 00:00:00.0		2020-03-30 00:00:00.0	054-03	51	1	HCW	1. Always	2020-03-17	0			2020-03-23				2020-04-06 00:00:00.0
100	54	59	0	2020-03-17	10.3051	2020-03-23 00:00:00.0	8.35047	2020-03-26 00:00:00.0		2020-03-30 00:00:00.0	054-04	24	1	HCW	1. Always	2020-03-17	0			2020-03-24				2020-04-07 00:00:00.0
101	55	33	1	2020-03-19	9.9436	2020-03-23 00:00:00.0	8.52884	2020-03-26 00:00:00.0		2020-03-30 00:00:00.0	055-01	43	1	Household	999. Unknown	2020-03-19	1	2020-03-24 00:00:00.0	4.08939	2020-03-23			4.8079	2020-04-06 00:00:00.0
102	55	33	1	2020-03-19	9.9436	2020-03-23 00:00:00.0	8.52884	2020-03-26 00:00:00.0		2020-03-30 00:00:00.0	055-02	35	0	Household	999. Unknown	2020-03-19	1	2020-03-23 00:00:00.0	7.12178	2020-03-23				2020-04-06 00:00:00.0
103	56	55	1	2020-03-19	9.79415	2020-03-23 00:00:00.0	5.90873	2020-03-26 00:00:00.0		2020-03-30 00:00:00.0	056-02	21	0	Household	0. Never	2020-03-19	1	2020-03-24 00:00:00.0	8.0814	2020-03-23			5.03532	2020-04-07 00:00:00.0
104	56	55	1	2020-03-19	9.79415	2020-03-23 00:00:00.0	5.90873	2020-03-26 00:00:00.0		2020-03-30 00:00:00.0	056-03	40	1	Household	999. Unknown	2020-03-19	0	2020-03-23 00:00:00.0		2020-03-23				2020-04-07 00:00:00.0
105	56	55	1	2020-03-19	9.79415	2020-03-23 00:00:00.0	5.90873	2020-03-26 00:00:00.0		2020-03-30 00:00:00.0	056-04	60	1	HCW	999. Unknown	2020-03-19	0			2020-03-23				2020-04-07 00:00:00.0
106	56	55	1	2020-03-19	9.79415	2020-03-23 00:00:00.0	5.90873	2020-03-26 00:00:00.0		2020-03-30 00:00:00.0	056-05	52	1	HCW	999. Unknown	2020-03-19	0			2020-03-23				2020-04-07 00:00:00.0
107	56	55	1	2020-03-19	9.79415	2020-03-23 00:00:00.0	5.90873	2020-03-26 00:00:00.0		2020-03-30 00:00:00.0	056-06	54	1	HCW	999. Unknown	2020-03-19	0			2020-03-24				2020-04-07 00:00:00.0
108	56	55	1	2020-03-19	9.79415	2020-03-23 00:00:00.0	5.90873	2020-03-26 00:00:00.0		2020-03-30 00:00:00.0	056-07	39	1	HCW	1. Always	2020-03-19	0			2020-03-24				2020-04-07 00:00:00.0
109	56	55	1	2020-03-19	9.79415	2020-03-23 00:00:00.0	5.90873	2020-03-26 00:00:00.0		2020-03-30 00:00:00.0	056-08	34	1	HCW	999. Unknown	2020-03-19	0			2020-03-23				2020-04-07 00:00:00.0
110	56	55	1	2020-03-19	9.79415	2020-03-23 00:00:00.0	5.90873	2020-03-26 00:00:00.0		2020-03-30 00:00:00.0	056-09	41	1	HCW	1. Always	2020-03-19	0			2020-03-23				2020-04-07 00:00:00.0
111	57	54	1	2020-03-17	10.0533	2020-03-22 00:00:00.0	8.85833	2020-03-25 00:00:00.0		2020-03-29 00:00:00.0	057-01	22	1	Household	999. Unknown	2020-03-18	0			2020-03-22				2020-04-05 00:00:00.0
112	57	54	1	2020-03-17	10.0533	2020-03-22 00:00:00.0	8.85833	2020-03-25 00:00:00.0		2020-03-29 00:00:00.0	057-02	21	1	Household	0. Never	2020-03-18	0	2020-03-25 00:00:00.0		2020-03-22		2020-04-01		2020-04-05 00:00:00.0
113	58	55	1	2020-03-18	9.32997	2020-03-23 00:00:00.0	8.3213	2020-03-26 00:00:00.0		2020-03-30 00:00:00.0	058-01	22	1	Household	999. Unknown	2020-03-18	0			2020-03-23				2020-04-06 00:00:00.0
114	58	55	1	2020-03-18	9.32997	2020-03-23 00:00:00.0	8.3213	2020-03-26 00:00:00.0		2020-03-30 00:00:00.0	058-02	48	1	HCW	999. Unknown	2020-03-17	1		6.64728	2020-03-23				2020-04-06 00:00:00.0
115	59	46	1	2020-03-21	10.7268	2020-03-23 00:00:00.0	10.6912	2020-03-26 00:00:00.0		2020-03-30 00:00:00.0	059-01	46	0	Household	999. Unknown	2020-03-21	0			2020-03-23				2020-04-06 00:00:00.0
116	60	50	1	2020-03-20	8.835	2020-03-23 00:00:00.0					060-01	49	0	Household	999. Unknown	2020-03-22	0			2020-03-23
117	61	25	1	2020-03-17	8.10557	2020-03-23 00:00:00.0	4.47334	2020-03-26 00:00:00.0		2020-03-30 00:00:00.0	061-01	27	0	Household	999. Unknown	2020-03-17	0			2020-03-23				2020-04-06 00:00:00.0
118	61	25	1	2020-03-17	8.10557	2020-03-23 00:00:00.0	4.47334	2020-03-26 00:00:00.0		2020-03-30 00:00:00.0	061-03	25	0	Household	999. Unknown	2020-03-17	0			2020-03-23				2020-04-06 00:00:00.0
119	63	19	0	2020-03-19	8.15082	2020-03-23 00:00:00.0	5.7407	2020-03-26 00:00:00.0		2020-03-30 00:00:00.0	063-01	27	0	Household	999. Unknown	2020-03-19	1	2020-03-23 00:00:00.0	7.97899	2020-03-23
120	63	19	0	2020-03-19	8.15082	2020-03-23 00:00:00.0	5.7407	2020-03-26 00:00:00.0		2020-03-30 00:00:00.0	063-02	55	1	Household	999. Unknown	2020-03-19	1	2020-03-20 00:00:00.0	10.9119	2020-03-23			6.8845	2020-04-06 00:00:00.0
121	65	60	1	2020-03-19	9.03013	2020-03-24 00:00:00.0	7.50376	2020-03-27 00:00:00.0		2020-03-31 00:00:00.0	065-01	59	0	Household	999. Unknown	2020-03-19	1		4.20997	2020-03-24				2020-04-07 00:00:00.0
122	65	60	1	2020-03-19	9.03013	2020-03-24 00:00:00.0	7.50376	2020-03-27 00:00:00.0		2020-03-31 00:00:00.0	065-02	82	1	Household	999. Unknown	2020-03-19	1		10.4249	2020-03-24				2020-04-07 00:00:00.0
123	67	34	1	2020-03-21	9.97565	2020-03-24 00:00:00.0	7.74267	2020-03-27 00:00:00.0		2020-03-31 00:00:00.0	067-02	31	1	HCW	1. Always	2020-03-20	0			2020-03-24				2020-04-07 00:00:00.0
124	68	53	1	2020-03-17	4.31514	2020-03-24 00:00:00.0	4.46756	2020-03-27 00:00:00.0		2020-03-31 00:00:00.0	068-02	43	0	Household	999. Unknown	2020-03-21	1	2020-03-21 00:00:00.0	6.13925	2020-03-24				2020-04-07 00:00:00.0
125	70	26	0	2020-03-22	9.71864	2020-03-24 00:00:00.0	4.6578	2020-03-27 00:00:00.0		2020-03-31 00:00:00.0	070-01	24	1	Household	999. Unknown	2020-03-19	0			2020-03-24				2020-04-07 00:00:00.0
126	71	45	1	2020-03-20	7.9776	2020-03-24 00:00:00.0	6.78029	2020-03-27 00:00:00.0		2020-03-31 00:00:00.0	071-01	53	1	NH	1. Always	2020-03-19	0			2020-03-24				2020-04-07 00:00:00.0
127	71	45	1	2020-03-20	7.9776	2020-03-24 00:00:00.0	6.78029	2020-03-27 00:00:00.0		2020-03-31 00:00:00.0	071-02	30	1	NH	0. Never	2020-03-18	0	2020-03-28 00:00:00.0		2020-03-24				2020-04-07 00:00:00.0
128	71	45	1	2020-03-20	7.9776	2020-03-24 00:00:00.0	6.78029	2020-03-27 00:00:00.0		2020-03-31 00:00:00.0	071-03	37	1	NH	0. Never	2020-03-19	0	2020-03-25 00:00:00.0		2020-03-24				2020-04-07 00:00:00.0
129	71	45	1	2020-03-20	7.9776	2020-03-24 00:00:00.0	6.78029	2020-03-27 00:00:00.0		2020-03-31 00:00:00.0	071-05	42	1	NH	999. Unknown	2020-03-19	0	2020-03-28 00:00:00.0		2020-03-26				2020-04-09 00:00:00.0
130	71	45	1	2020-03-20	7.9776	2020-03-24 00:00:00.0	6.78029	2020-03-27 00:00:00.0		2020-03-31 00:00:00.0	071-06	62	1	NH	999. Unknown	2020-03-19	0			2020-03-26				2020-04-09 00:00:00.0
131	71	45	1	2020-03-20	7.9776	2020-03-24 00:00:00.0	6.78029	2020-03-27 00:00:00.0		2020-03-31 00:00:00.0	071-07	44	1	NH	999. Unknown	2020-03-19	0	2020-03-26 00:00:00.0		2020-03-26				2020-04-09 00:00:00.0
132	71	45	1	2020-03-20	7.9776	2020-03-24 00:00:00.0	6.78029	2020-03-27 00:00:00.0		2020-03-31 00:00:00.0	071-08	82	1	NH	999. Unknown	2020-03-19	0			2020-03-26				2020-04-09 00:00:00.0
133	71	45	1	2020-03-20	7.9776	2020-03-24 00:00:00.0	6.78029	2020-03-27 00:00:00.0		2020-03-31 00:00:00.0	071-10	52	1	NH	999. Unknown	2020-04-25	0			2020-03-26				2020-04-09 00:00:00.0
134	71	45	1	2020-03-20	7.9776	2020-03-24 00:00:00.0	6.78029	2020-03-27 00:00:00.0		2020-03-31 00:00:00.0	071-11	35	1	NH	999. Unknown	2020-03-26	1		6.73692	2020-03-26				2020-04-09 00:00:00.0
135	71	45	1	2020-03-20	7.9776	2020-03-24 00:00:00.0	6.78029	2020-03-27 00:00:00.0		2020-03-31 00:00:00.0	071-12	34	1	NH	999. Unknown	2020-03-26	0			2020-03-26				2020-04-09 00:00:00.0
136	72	58	0	2020-03-20	5.17868	2020-03-24 00:00:00.0					072-01	20	1	Household	0. Never	2020-03-23	0			2020-03-24				2020-04-07 00:00:00.0
137	72	58	0	2020-03-20	5.17868	2020-03-24 00:00:00.0					072-02	24	1	Household	0. Never	2020-03-23	0			2020-03-24				2020-04-07 00:00:00.0
138	72	58	0	2020-03-20	5.17868	2020-03-24 00:00:00.0					072-03	53	1	Household	1. Always	2020-03-21	0	2020-03-24 00:00:00.0		2020-03-24				2020-04-07 00:00:00.0
139	73	62	1	2020-03-20	5.17868	2020-03-24 00:00:00.0		2020-03-27 00:00:00.0		2020-03-31 00:00:00.0	073-01	57	1	HCW	1. Always	2020-03-19	0	2020-03-25 00:00:00.0		2020-03-24				2020-04-07 00:00:00.0
140	74	35	0	2020-03-20	11.4623	2020-03-24 00:00:00.0	9.18316	2020-03-27 00:00:00.0		2020-03-31 00:00:00.0	074-01	63	1	HCW	1. Always	2020-03-17	1		4.03218	2020-03-24				2020-04-07 00:00:00.0
141	75	36	1		5.07717	2020-03-27 00:00:00.0		2020-03-30 00:00:00.0		2020-04-03 00:00:00.0	075-01	29	1	HCW	999. Unknown	2020-03-23	0			2020-03-27				2020-04-10 00:00:00.0
142	80	31	1	2020-03-24	5.76818	2020-03-25 00:00:00.0	4.03208	2020-03-28 00:00:00.0		2020-04-01 00:00:00.0	080-02	35	1	HCW	999. Unknown	2020-03-20	1		5.30049	2020-03-25				2020-04-08 00:00:00.0
143	81	24	1	2020-03-21	8.48055	2020-03-25 00:00:00.0	7.88157	2020-03-28 00:00:00.0		2020-04-01 00:00:00.0	081-02	23	1	HCW	1. Always	2020-03-20	0			2020-03-25				2020-04-11 00:00:00.0
144	85	50	1	2020-03-20	10.0294	2020-03-25 00:00:00.0	7.02766	2020-03-28 00:00:00.0		2020-04-01 00:00:00.0	085-01	76	0	Household	999. Unknown	2020-03-23	1		6.62808	2020-03-25			7.22525	2020-04-08 00:00:00.0
145	85	50	1	2020-03-20	10.0294	2020-03-25 00:00:00.0	7.02766	2020-03-28 00:00:00.0		2020-04-01 00:00:00.0	085-02	73	1	Household	999. Unknown	2020-03-23	1	2020-03-13 00:00:00.0	5.8082	2020-03-25
146	87	24	1	2020-03-21	6.44685	2020-03-25 00:00:00.0	7.0966	2020-03-28 00:00:00.0		2020-04-01 00:00:00.0	087-01	55	1	Household	999. Unknown	2020-03-21	0			2020-03-25				2020-04-08 00:00:00.0
147	87	24	1	2020-03-21	6.44685	2020-03-25 00:00:00.0	7.0966	2020-03-28 00:00:00.0		2020-04-01 00:00:00.0	087-02	49	0	Household	999. Unknown	2020-03-21	0			2020-03-25				2020-04-08 00:00:00.0
148	87	24	1	2020-03-21	6.44685	2020-03-25 00:00:00.0	7.0966	2020-03-28 00:00:00.0		2020-04-01 00:00:00.0	087-03	20	1	Household	999. Unknown	2020-03-21	0
149	91	44	1	2020-03-21	10.106	2020-03-25 00:00:00.0	6.37072	2020-03-28 00:00:00.0		2020-04-01 00:00:00.0	091-01	42	0	Household	1. Always	2020-03-20	0			2020-03-25				2020-04-08 00:00:00.0
150	91	44	1	2020-03-21	10.106	2020-03-25 00:00:00.0	6.37072	2020-03-28 00:00:00.0		2020-04-01 00:00:00.0	091-02	37	1	HCW	1. Always	2020-03-17	0			2020-03-25				2020-04-09 00:00:00.0
151	91	44	1	2020-03-21	10.106	2020-03-25 00:00:00.0	6.37072	2020-03-28 00:00:00.0		2020-04-01 00:00:00.0	091-03	46	1	HCW	999. Unknown	2020-03-17	0			2020-03-25				2020-04-08 00:00:00.0
152	93	51	1	2020-03-19	10.1118	2020-03-25 00:00:00.0	5.42053	2020-03-28 00:00:00.0		2020-04-01 00:00:00.0	093-01	51	0	Household	999. Unknown	2020-03-20	1		7.85954	2020-03-26
153	93	51	1	2020-03-19	10.1118	2020-03-25 00:00:00.0	5.42053	2020-03-28 00:00:00.0		2020-04-01 00:00:00.0	093-02	77	1	Household	999. Unknown	2020-03-20	0			2020-03-26				2020-04-08 00:00:00.0
154	93	51	1	2020-03-19	10.1118	2020-03-25 00:00:00.0	5.42053	2020-03-28 00:00:00.0		2020-04-01 00:00:00.0	093-03	80	0	Household	999. Unknown	2020-03-20	0			2020-03-25				2020-04-08 00:00:00.0
155	94	49	0	2020-03-22	9.18134	2020-03-25 00:00:00.0	8.38514	2020-03-28 00:00:00.0		2020-04-01 00:00:00.0	094-01	47	0	HCW	999. Unknown	2020-03-19	0			2020-03-25				2020-04-08 00:00:00.0
156	95	46	0	2020-03-21	8.98552	2020-03-25 00:00:00.0	6.49674	2020-03-28 00:00:00.0		2020-04-01 00:00:00.0	095-01	46	1	HCW	999. Unknown	2020-03-12	0			2020-03-25				2020-04-08 00:00:00.0
157	95	46	0	2020-03-21	8.98552	2020-03-25 00:00:00.0	6.49674	2020-03-28 00:00:00.0		2020-04-01 00:00:00.0	095-03	38	1	Household	999. Unknown	2020-03-09	0			2020-03-25				2020-04-08 00:00:00.0
158	95	46	0	2020-03-21	8.98552	2020-03-25 00:00:00.0	6.49674	2020-03-28 00:00:00.0		2020-04-01 00:00:00.0	095-07	55	1	HCW	999. Unknown	2020-03-13	0			2020-03-25				2020-04-08 00:00:00.0
159	96	63	1	2020-03-20	8.97681	2020-03-25 00:00:00.0	5.79205	2020-03-28 00:00:00.0		2020-04-01 00:00:00.0	096-01	61	0	Household	1. Always	2020-03-20	0			2020-03-25				2020-04-08 00:00:00.0
160	98	44	1	2020-03-23	9.94022	2020-03-25 00:00:00.0	5.96518	2020-03-28 00:00:00.0		2020-04-01 00:00:00.0	098-01	57	0	Household	1. Always	2020-03-22	1		7.15708	2020-03-25				2020-04-08 00:00:00.0
161	100	30	1	2020-03-22	9.21406	2020-03-26 00:00:00.0	5.63823	2020-03-29 00:00:00.0		2020-04-02 00:00:00.0	100-01	33	0	Household	999. Unknown	2020-03-22	0			2020-03-26				2020-04-09 00:00:00.0
162	107	44	1	2020-03-22	8.31537	2020-03-26 00:00:00.0	6.09591	2020-03-29 00:00:00.0		2020-04-02 00:00:00.0	107-01	42	0	Household	999. Unknown	2020-03-21	0			2020-03-26				2020-04-09 00:00:00.0
163	117	22	0	2020-03-20	9.76966	2020-03-26 00:00:00.0	6.32804	2020-03-29 00:00:00.0		2020-04-02 00:00:00.0	117-01	52	0	Household	999. Unknown	2020-03-20	0			2020-03-26				2020-04-09 00:00:00.0
164	117	22	0	2020-03-20	9.76966	2020-03-26 00:00:00.0	6.32804	2020-03-29 00:00:00.0		2020-04-02 00:00:00.0	117-02	53	1	Household	999. Unknown	2020-03-23	0			2020-03-26				2020-04-09 00:00:00.0
165	117	22	0	2020-03-20	9.76966	2020-03-26 00:00:00.0	6.32804	2020-03-29 00:00:00.0		2020-04-02 00:00:00.0	117-03	21	0	Household	999. Unknown	2020-03-20	0			2020-03-26				2020-04-09 00:00:00.0
166	117	22	0	2020-03-20	9.76966	2020-03-26 00:00:00.0	6.32804	2020-03-29 00:00:00.0		2020-04-02 00:00:00.0	117-04	49	0	Household	999. Unknown	2020-03-20	0			2020-03-26				2020-04-09 00:00:00.0
167	121	23	1	2020-03-21	8.1324	2020-03-26 00:00:00.0	8.12686	2020-03-29 00:00:00.0		2020-04-02 00:00:00.0	121-01	52	1	HCW	1. Always	2020-03-23	0	2020-03-27 00:00:00.0		2020-03-26				2020-04-09 00:00:00.0
168	122	49	0	2020-03-21	10.0017	2020-03-26 00:00:00.0	9.72154	2020-03-29 00:00:00.0		2020-04-02 00:00:00.0	122-01	52	1	HCW	1. Always	2020-03-25	1	2020-04-01 00:00:00.0	6.52943	2020-03-26				2020-04-09 00:00:00.0
169	129	52	1	2020-03-20	8.65794	2020-03-26 00:00:00.0	7.66063	2020-03-29 00:00:00.0			129-01	43	1	HCW	999. Unknown	2020-03-23	0	2020-03-27 00:00:00.0		2020-03-26				2020-04-09 00:00:00.0
170	129	52	1	2020-03-20	8.65794	2020-03-26 00:00:00.0	7.66063	2020-03-29 00:00:00.0			129-02	38	0	HCW	999. Unknown	2020-03-23	0			2020-03-26				2020-04-09 00:00:00.0
171	129	52	1	2020-03-20	8.65794	2020-03-26 00:00:00.0	7.66063	2020-03-29 00:00:00.0			129-08	36	0	HCW	999. Unknown	2020-03-25	0	2020-03-29 00:00:00.0		2020-03-26				2020-04-09 00:00:00.0
172	129	52	1	2020-03-20	8.65794	2020-03-26 00:00:00.0	7.66063	2020-03-29 00:00:00.0			129-09	52	1	HCW	999. Unknown	2020-03-25	0	2020-03-30 00:00:00.0		2020-03-26
173	132	31	1	2020-03-22	9.45506	2020-03-26 00:00:00.0	7.93782	2020-03-29 00:00:00.0		2020-04-02 00:00:00.0	132-01	36	0	Household	999. Unknown	2020-03-22	1		7.34618	2020-03-26
174	139	48	0	2020-03-23	9.60589	2020-03-26 00:00:00.0	8.07839	2020-03-29 00:00:00.0		2020-04-02 00:00:00.0	139-01	45	1	Household	0. Never	2020-03-23	1		5.79197	2020-03-26				2020-04-09 00:00:00.0
175	139	48	0	2020-03-23	9.60589	2020-03-26 00:00:00.0	8.07839	2020-03-29 00:00:00.0		2020-04-02 00:00:00.0	139-02	19	1	Household	0. Never	2020-03-23	1		7.09396	2020-03-26				2020-04-09 00:00:00.0
176	140	55	1	2020-03-25	9.27087	2020-03-26 00:00:00.0	7.74332	2020-03-29 00:00:00.0		2020-04-02 00:00:00.0	140-01	20	1	Household	999. Unknown	2020-03-21	0	2020-03-28 00:00:00.0		2020-03-26				2020-04-09 00:00:00.0
177	142	61	0	2020-03-23	8.90621	2020-03-26 00:00:00.0	7.79436	2020-03-29 00:00:00.0		2020-04-02 00:00:00.0	142-01	59	1	Household	999. Unknown	2020-03-23	0			2020-03-26				2020-04-09 00:00:00.0
178	144	58	1	2020-03-25	9.62129	2020-03-27 00:00:00.0	7.67104	2020-03-30 00:00:00.0		2020-04-03 00:00:00.0	144-01	23	1	Household	999. Unknown	2020-03-23	1		5.92804	2020-03-27			4.58005	2020-04-10 00:00:00.0
179	144	58	1	2020-03-25	9.62129	2020-03-27 00:00:00.0	7.67104	2020-03-30 00:00:00.0		2020-04-03 00:00:00.0	144-02	59	0	Household	999. Unknown	2020-03-23	0			2020-03-27				2020-04-10 00:00:00.0
180	144	58	1	2020-03-25	9.62129	2020-03-27 00:00:00.0	7.67104	2020-03-30 00:00:00.0		2020-04-03 00:00:00.0	144-03	23	0	Household	999. Unknown	2020-03-23	0			2020-03-27				2020-04-10 00:00:00.0
181	149	47	0	2020-03-23		2020-03-27 00:00:00.0	8.83154	2020-03-30 00:00:00.0		2020-04-03 00:00:00.0	149-01	43	1	HCW	999. Unknown	2020-03-21	1			2020-03-27				2020-04-10 00:00:00.0
182	152	59	1	2020-03-24		2020-03-27 00:00:00.0	7.03366	2020-03-30 00:00:00.0		2020-04-03 00:00:00.0	152-01	19	1	Household	999. Unknown	2020-03-24	0			2020-03-27				2020-04-10 00:00:00.0
183	152	59	1	2020-03-24		2020-03-27 00:00:00.0	7.03366	2020-03-30 00:00:00.0		2020-04-03 00:00:00.0	152-02	21	0	Household	999. Unknown	2020-03-24	0			2020-03-27				2020-04-10 00:00:00.0
184	154	54	1	2020-03-25	10.324	2020-03-27 00:00:00.0	8.78226	2020-03-30 00:00:00.0		2020-04-03 00:00:00.0	154-01	26	0	Household	0. Never	2020-03-25	0			2020-03-27				2020-04-10 00:00:00.0
185	154	54	1	2020-03-25	10.324	2020-03-27 00:00:00.0	8.78226	2020-03-30 00:00:00.0		2020-04-03 00:00:00.0	154-02	22	0	Household	0. Never	2020-03-25	0			2020-03-27				2020-04-10 00:00:00.0
186	154	54	1	2020-03-25	10.324	2020-03-27 00:00:00.0	8.78226	2020-03-30 00:00:00.0		2020-04-03 00:00:00.0	154-03	54	0	Household	0. Never	2020-03-25	0			2020-03-27				2020-04-10 00:00:00.0
187	155	43	1	2020-03-22	7.44468	2020-03-27 00:00:00.0	7.71787	2020-03-30 00:00:00.0		2020-04-03 00:00:00.0	155-01	41	0	Household	0. Never	2020-03-22	0			2020-03-27				2020-04-10 00:00:00.0
188	156	80	1	2020-03-22	6.6384	2020-03-27 00:00:00.0					156-01						1		6.1965
189	164	57	0	2020-03-24	9.16346	2020-03-27 00:00:00.0	8.06537	2020-03-30 00:00:00.0		2020-04-03 00:00:00.0	164-01	84	1	Household	0. Never	2020-03-26	1		9.87013	2020-03-27
190	164	57	0	2020-03-24	9.16346	2020-03-27 00:00:00.0	8.06537	2020-03-30 00:00:00.0		2020-04-03 00:00:00.0	164-02	86	0	Household	0. Never	2020-03-26	1	2020-03-28 00:00:00.0	7.99557	2020-03-27
191	168	31	0		4.62543	2020-03-28 00:00:00.0	4.87168	2020-03-31 00:00:00.0		2020-04-04 00:00:00.0	168-01	34	1	Household	0. Never	2020-03-26	0			2020-03-28				2020-04-11 00:00:00.0
192	171	28	0	2020-03-23	4.83351	2020-03-28 00:00:00.0	5.14076	2020-03-31 00:00:00.0		2020-04-04 00:00:00.0	171-01	25	1	Household	0. Never	2020-03-24	0			2020-03-28				2020-04-11 00:00:00.0
193	176	50	1	2020-03-21	11.3282	2020-03-27 00:00:00.0	8.34465	2020-03-30 00:00:00.0		2020-04-03 00:00:00.0	176-01	49	0	Household	1. Always	2020-03-23	0			2020-03-27				2020-04-10 00:00:00.0
194	178	41	1	2020-03-27	9.09032	2020-03-29 00:00:00.0	7.62147	2020-04-01 00:00:00.0		2020-04-04 00:00:00.0	178-01	52	1	Household	1. Always	2020-03-26	0			2020-03-29				2020-04-11 00:00:00.0
195	179	74	1		7.0045						179-01	41	1	HCW	1. Always	2020-03-22	1	2020-04-07 00:00:00.0		2020-03-28				2020-04-12 00:00:00.0
196	179	74	1		7.0045						179-04	52	0	HCW	1. Always	2020-03-26	1		7.39515	2020-03-28				2020-04-11 00:00:00.0
197	179	74	1		7.0045						179-05	52	0	HCW	999. Unknown	2020-03-26	0			2020-03-28				2020-04-11 00:00:00.0
198	181	34	1	2020-03-24	8.29922	2020-03-28 00:00:00.0	6.63519	2020-03-31 00:00:00.0		2020-04-04 00:00:00.0	181-01	60	1	Household	1. Always	2020-03-24	0			2020-03-28				2020-04-11 00:00:00.0
199	181	34	1	2020-03-24	8.29922	2020-03-28 00:00:00.0	6.63519	2020-03-31 00:00:00.0		2020-04-04 00:00:00.0	181-02	63	1	Household	1. Always	2020-03-28	0			2020-03-29				2020-04-11 00:00:00.0
200	182	39	1	2020-03-24	5.68644	2020-03-28 00:00:00.0	5.35398	2020-03-31 00:00:00.0		2020-04-04 00:00:00.0	182-01	67	1	Household	1. Always	2020-03-24	0			2020-03-28				2020-04-11 00:00:00.0
201	183	56	1	2020-03-26	9.80185	2020-03-29 00:00:00.0	6.03297	2020-04-02 00:00:00.0		2020-04-04 00:00:00.0	183-01	58	0	Household	1. Always	2020-03-26	0			2020-03-28				2020-04-11 00:00:00.0
202	186	46	1	2020-03-25	9.13556	2020-03-28 00:00:00.0	9.0899	2020-03-31 00:00:00.0		2020-04-04 00:00:00.0	186-01	50	0	Household	1. Always	2020-03-25	0			2020-03-28				2020-04-11 00:00:00.0
203	186	46	1	2020-03-25	9.13556	2020-03-28 00:00:00.0	9.0899	2020-03-31 00:00:00.0		2020-04-04 00:00:00.0	186-02	19	0	Household	1. Always	2020-03-25	0			2020-03-28				2020-04-11 00:00:00.0
204	191	24	0	2020-03-22	8.28744	2020-03-28 00:00:00.0	9.29772	2020-03-31 00:00:00.0		2020-04-04 00:00:00.0	191-01	27	1	Household	0. Never	2020-03-24	0	2020-03-25 00:00:00.0		2020-03-28				2020-04-11 00:00:00.0
205	192	31	0	2020-03-25	10.8109	2020-03-28 00:00:00.0	7.0503	2020-03-31 00:00:00.0		2020-04-04 00:00:00.0	192-01	23	1	Household	1. Always	2020-03-25	0			2020-03-28				2020-04-11 00:00:00.0
206	192	31	0	2020-03-25	10.8109	2020-03-28 00:00:00.0	7.0503	2020-03-31 00:00:00.0		2020-04-04 00:00:00.0	192-03	23	0	Household	0. Never	2020-03-25	0			2020-03-28				2020-04-11 00:00:00.0
207	192	31	0	2020-03-25	10.8109	2020-03-28 00:00:00.0	7.0503	2020-03-31 00:00:00.0		2020-04-04 00:00:00.0	192-04	48	1	HCW	1. Always	2020-03-25	0			2020-03-29				2020-04-12 00:00:00.0
208	199	27	0	2020-03-26	6.28084	2020-03-29 00:00:00.0	8.78283	2020-04-01 00:00:00.0		2020-04-05 00:00:00.0	199-01	26	1	Household	1. Always	2020-03-29	0			2020-03-29				2020-04-12 00:00:00.0
209	200	50	1	2020-03-26		2020-03-28 00:00:00.0	5.11154	2020-03-31 00:00:00.0		2020-04-04 00:00:00.0	200-01	50	0	Household	1. Always	2020-03-28	0	2020-03-26 00:00:00.0		2020-03-28				2020-04-11 00:00:00.0
210	200	50	1	2020-03-26		2020-03-28 00:00:00.0	5.11154	2020-03-31 00:00:00.0		2020-04-04 00:00:00.0	200-02	22	0	HCW	1. Always	2020-03-27	1		11.0316	2020-03-28
211	200	50	1	2020-03-26		2020-03-28 00:00:00.0	5.11154	2020-03-31 00:00:00.0		2020-04-04 00:00:00.0	200-03	41	0	HCW	1. Always	2020-03-27	0			2020-03-28
212	200	50	1	2020-03-26		2020-03-28 00:00:00.0	5.11154	2020-03-31 00:00:00.0		2020-04-04 00:00:00.0	200-04	30	0	HCW	1. Always	2020-03-27	0			2020-03-28
213	200	50	1	2020-03-26		2020-03-28 00:00:00.0	5.11154	2020-03-31 00:00:00.0		2020-04-04 00:00:00.0	200-05	22	1	HCW	1. Always	2020-03-27	0			2020-03-28
214	200	50	1	2020-03-26		2020-03-28 00:00:00.0	5.11154	2020-03-31 00:00:00.0		2020-04-04 00:00:00.0	200-06	49	1	HCW	1. Always	2020-03-27	0			2020-03-28
215	200	50	1	2020-03-26		2020-03-28 00:00:00.0	5.11154	2020-03-31 00:00:00.0		2020-04-04 00:00:00.0	200-07	38	0		1. Always		0			2020-03-28
216	200	50	1	2020-03-26		2020-03-28 00:00:00.0	5.11154	2020-03-31 00:00:00.0		2020-04-04 00:00:00.0	200-08	24	1	HCW	1. Always	2020-03-27	0			2020-03-28
217	200	50	1	2020-03-26		2020-03-28 00:00:00.0	5.11154	2020-03-31 00:00:00.0		2020-04-04 00:00:00.0	200-09	24	0		1. Always	2020-03-27	0
218	200	50	1	2020-03-26		2020-03-28 00:00:00.0	5.11154	2020-03-31 00:00:00.0		2020-04-04 00:00:00.0	200-11	20	1	HCW	1. Always	2020-03-27	0			2020-03-28
219	200	50	1	2020-03-26		2020-03-28 00:00:00.0	5.11154	2020-03-31 00:00:00.0		2020-04-04 00:00:00.0	200-12	21	1	HCW	1. Always	2020-03-27	0			2020-03-28
220	200	50	1	2020-03-26		2020-03-28 00:00:00.0	5.11154	2020-03-31 00:00:00.0		2020-04-04 00:00:00.0	200-13	53	0	HCW	1. Always	2020-03-27	0			2020-03-28
221	200	50	1	2020-03-26		2020-03-28 00:00:00.0	5.11154	2020-03-31 00:00:00.0		2020-04-04 00:00:00.0	200-14	22	1	HCW	1. Always	2020-03-27	0			2020-03-28
222	203	39	0	2020-03-25	6.59772	2020-03-29 00:00:00.0	4.92372	2020-04-01 00:00:00.0		2020-04-05 00:00:00.0	203-01	52	0	HCW	1. Always	2020-03-24	0			2020-03-29				2020-04-12 00:00:00.0
223	203	39	0	2020-03-25	6.59772	2020-03-29 00:00:00.0	4.92372	2020-04-01 00:00:00.0		2020-04-05 00:00:00.0	203-03	49	1	HCW	1. Always	2020-03-25	0			2020-03-29				2020-04-12 00:00:00.0
224	203	39	0	2020-03-25	6.59772	2020-03-29 00:00:00.0	4.92372	2020-04-01 00:00:00.0		2020-04-05 00:00:00.0	203-05	46	1	HCW	999. Unknown	2020-03-26	0	2020-04-04 00:00:00.0		2020-03-29
225	203	39	0	2020-03-25	6.59772	2020-03-29 00:00:00.0	4.92372	2020-04-01 00:00:00.0		2020-04-05 00:00:00.0	203-06	38	1	HCW	999. Unknown	2020-03-26	0			2020-03-29				2020-04-12 00:00:00.0
226	204	39	1	2020-03-27	6.89093	2020-03-29 00:00:00.0	5.64489	2020-04-01 00:00:00.0		2020-04-05 00:00:00.0	204-01	45	1	HCW	999. Unknown	2020-03-27	1			2020-03-29				2020-04-12 00:00:00.0
227	204	39	1	2020-03-27	6.89093	2020-03-29 00:00:00.0	5.64489	2020-04-01 00:00:00.0		2020-04-05 00:00:00.0	204-05	31	0	HCW	999. Unknown	2020-03-27	0			2020-03-29
228	206	60	0	2020-03-26	8.56277	2020-03-29 00:00:00.0	7.62564	2020-04-01 00:00:00.0		2020-04-05 00:00:00.0	206-01	61	1	HCW	1. Always	2020-03-25	1	2020-03-30 00:00:00.0	8.05476	2020-03-29				2020-04-12 00:00:00.0
229	206	60	0	2020-03-26	8.56277	2020-03-29 00:00:00.0	7.62564	2020-04-01 00:00:00.0		2020-04-05 00:00:00.0	206-02	46	0	HCW	1. Always	2020-03-25	1	2020-03-28 00:00:00.0		2020-03-29			7.3706	2020-04-16 00:00:00.0
230	206	60	0	2020-03-26	8.56277	2020-03-29 00:00:00.0	7.62564	2020-04-01 00:00:00.0		2020-04-05 00:00:00.0	206-03	54	1	HCW	1. Always	2020-03-25	0	2020-03-31 00:00:00.0		2020-03-29				2020-04-13 00:00:00.0
231	207	39	1	2020-03-24	9.04747	2020-03-29 00:00:00.0	6.82636	2020-04-01 00:00:00.0		2020-04-05 00:00:00.0	207-01	48	0	Household	999. Unknown	2020-03-24	1	2020-04-02 00:00:00.0	4.00414	2020-03-29		2020-04-08
232	208	32	0	2020-03-25	7.8687	2020-03-29 00:00:00.0	5.45202	2020-04-01 00:00:00.0		2020-04-05 00:00:00.0	208-01	25	1	Household	0. Never	2020-03-23	0	2020-04-05 00:00:00.0		2020-03-29				2020-04-12 00:00:00.0
233	208	32	0	2020-03-25	7.8687	2020-03-29 00:00:00.0	5.45202	2020-04-01 00:00:00.0		2020-04-05 00:00:00.0	208-02	32	1	HCW	1. Always	2020-03-22	0			2020-03-29				2020-04-12 00:00:00.0
234	208	32	0	2020-03-25	7.8687	2020-03-29 00:00:00.0	5.45202	2020-04-01 00:00:00.0		2020-04-05 00:00:00.0	208-03	41	1	HCW	1. Always	2020-03-22	0			2020-03-29		2020-04-06		2020-04-12 00:00:00.0
235	208	32	0	2020-03-25	7.8687	2020-03-29 00:00:00.0	5.45202	2020-04-01 00:00:00.0		2020-04-05 00:00:00.0	208-04	46	0	HCW	1. Always	2020-03-22	0	2020-04-08 00:00:00.0		2020-03-28				2020-04-12 00:00:00.0
236	209	35	1	2020-03-25	7.81293	2020-03-29 00:00:00.0	9.51874	2020-04-01 00:00:00.0		2020-04-05 00:00:00.0	209-01	29	1	Household	0. Never	2020-03-25	0	2020-04-09 00:00:00.0		2020-03-29				2020-04-12 00:00:00.0
237	210	54	1	2020-03-25	10.9621	2020-03-29 00:00:00.0	8.83958	2020-04-01 00:00:00.0			210-01	22	1	Household	1. Always	2020-03-26	0	2020-03-29 00:00:00.0		2020-03-29				2020-04-12 00:00:00.0
238	210	54	1	2020-03-25	10.9621	2020-03-29 00:00:00.0	8.83958	2020-04-01 00:00:00.0			210-02	20	0	Household	1. Always	2020-03-26	0			2020-03-29				2020-04-12 00:00:00.0
239	210	54	1	2020-03-25	10.9621	2020-03-29 00:00:00.0	8.83958	2020-04-01 00:00:00.0			210-03	19	0	Household	1. Always	2020-03-26	0			2020-03-29				2020-04-12 00:00:00.0
240	211	31	0	2020-03-26	8.42939	2020-03-29 00:00:00.0	6.69183	2020-04-01 00:00:00.0		2020-04-05 00:00:00.0	211-01	63	1	Household	999. Unknown	2020-03-25	1			2020-03-29			5.174	2020-04-12 00:00:00.0
241	213	66	1	2020-03-26	5.19554	2020-03-30 00:00:00.0	5.06769	2020-04-02 00:00:00.0		2020-04-05 00:00:00.0	213-01	67	0	Household	1. Always	2020-03-30	0			2020-03-30				2020-04-13 00:00:00.0
242	215	22	1	2020-03-24	6.62501	2020-03-30 00:00:00.0	6.1226	2020-04-02 00:00:00.0		2020-04-06 00:00:00.0	215-03	42	0	HCW	1. Always	2020-03-26	0			2020-03-30				2020-04-13 00:00:00.0
243	215	22	1	2020-03-24	6.62501	2020-03-30 00:00:00.0	6.1226	2020-04-02 00:00:00.0		2020-04-06 00:00:00.0	215-04	41	1	HCW	1. Always	2020-03-26	0			2020-03-30				2020-04-13 00:00:00.0
244	216	47	1	2020-03-22		2020-03-29 00:00:00.0		2020-04-01 00:00:00.0		2020-04-05 00:00:00.0	216-01	48	0	Household	0. Never	2020-03-24	0			2020-03-29				2020-04-12 00:00:00.0
245	216	47	1	2020-03-22		2020-03-29 00:00:00.0		2020-04-01 00:00:00.0		2020-04-05 00:00:00.0	216-02	71	1	Household	0. Never	2020-03-24	0			2020-03-29				2020-04-12 00:00:00.0
246	216	47	1	2020-03-22		2020-03-29 00:00:00.0		2020-04-01 00:00:00.0		2020-04-05 00:00:00.0	216-03	74	0	Household	0. Never	2020-03-24	0			2020-03-29				2020-04-12 00:00:00.0
247	218	41	1	2020-03-25	8.835	2020-03-30 00:00:00.0					218-01	42	0	Household	0. Never	2020-03-25	0			2020-03-30				2020-04-13 00:00:00.0
248	220	58	1	2020-03-26	11.0858	2020-03-29 00:00:00.0	7.28132	2020-04-01 00:00:00.0		2020-04-05 00:00:00.0	220-01	58	0	Household	0. Never	2020-03-26	1	2020-04-03 00:00:00.0		2020-03-29	8.835	2020-04-10	4.4418	2020-04-12 00:00:00.0
249	220	58	1	2020-03-26	11.0858	2020-03-29 00:00:00.0	7.28132	2020-04-01 00:00:00.0		2020-04-05 00:00:00.0	220-02	21	1	Household	0. Never	2020-03-26	0			2020-03-29				2020-04-12 00:00:00.0
250	221	52	1	2020-03-26	9.51837	2020-03-30 00:00:00.0	7.885	2020-04-02 00:00:00.0		2020-04-06 00:00:00.0	221-01	53	0	Household	0. Never	2020-03-26	0			2020-03-30				2020-04-13 00:00:00.0
251	222	49	1	2020-03-26	9.02434	2020-03-30 00:00:00.0	6.57384	2020-04-02 00:00:00.0		2020-04-06 00:00:00.0	222-01	20	1	Household	0. Never	2020-03-26	0			2020-03-30				2020-04-13 00:00:00.0
252	222	49	1	2020-03-26	9.02434	2020-03-30 00:00:00.0	6.57384	2020-04-02 00:00:00.0		2020-04-06 00:00:00.0	222-02	23	0	Household	0. Never	2020-03-26	0			2020-03-30				2020-04-13 00:00:00.0
253	222	49	1	2020-03-26	9.02434	2020-03-30 00:00:00.0	6.57384	2020-04-02 00:00:00.0		2020-04-06 00:00:00.0	222-03	52	0	Household	0. Never	2020-03-26	1			2020-03-30			6.6384	2020-04-13 00:00:00.0
254	223	37	0	2020-03-25	6.2723	2020-03-30 00:00:00.0	4.0757	2020-04-03 00:00:00.0		2020-04-06 00:00:00.0	223-01	61	0	Household	999. Unknown	2020-03-25	0			2020-03-30				2020-04-13 00:00:00.0
255	223	37	0	2020-03-25	6.2723	2020-03-30 00:00:00.0	4.0757	2020-04-03 00:00:00.0		2020-04-06 00:00:00.0	223-02	58	1	Household	999. Unknown	2020-03-25	0			2020-03-30				2020-04-13 00:00:00.0
256	227	50	1	2020-03-25	6.26879	2020-03-30 00:00:00.0	4.22691	2020-04-02 00:00:00.0		2020-04-06 00:00:00.0	227-01	51	0	Household	999. Unknown	2020-03-26	1			2020-03-30			4.8079	2020-04-13 00:00:00.0
257	227	50	1	2020-03-25	6.26879	2020-03-30 00:00:00.0	4.22691	2020-04-02 00:00:00.0		2020-04-06 00:00:00.0	227-02	25	0	Household	999. Unknown	2020-03-26	0			2020-03-30				2020-04-13 00:00:00.0
258	227	50	1	2020-03-25	6.26879	2020-03-30 00:00:00.0	4.22691	2020-04-02 00:00:00.0		2020-04-06 00:00:00.0	227-03	21	0	Household	999. Unknown	2020-03-26	0			2020-03-30				2020-04-13 00:00:00.0
259	228	50	0			2020-03-30 00:00:00.0		2020-04-02 00:00:00.0		2020-04-06 00:00:00.0	228-01	46	1	Household	999. Unknown	2020-03-27	0			2020-03-30				2020-04-13 00:00:00.0
260	228	50	0			2020-03-30 00:00:00.0		2020-04-02 00:00:00.0		2020-04-06 00:00:00.0	228-03	61	1	HCW	999. Unknown	2020-03-27	0			2020-03-30				2020-04-13 00:00:00.0
261	228	50	0			2020-03-30 00:00:00.0		2020-04-02 00:00:00.0		2020-04-06 00:00:00.0	228-04	52	1	HCW	999. Unknown	2020-03-27	0			2020-03-30				2020-04-13 00:00:00.0
262	230	61	1	2020-03-25	6.10671	2020-03-30 00:00:00.0	6.13152	2020-04-02 00:00:00.0		2020-04-06 00:00:00.0	230-01	64	0	Household	0. Never	2020-03-25	0			2020-03-30				2020-04-13 00:00:00.0
263	230	61	1	2020-03-25	6.10671	2020-03-30 00:00:00.0	6.13152	2020-04-02 00:00:00.0		2020-04-06 00:00:00.0	230-02	50	1	HCW	1. Always	2020-03-25	1	2020-03-29 00:00:00.0	9.59051	2020-03-30				2020-04-13 00:00:00.0
264	231	30	1	2020-03-25	9.52559	2020-03-30 00:00:00.0	5.73765	2020-04-02 00:00:00.0		2020-04-06 00:00:00.0	231-01	29	0	Household	999. Unknown	2020-03-25	1	2020-03-23 00:00:00.0		2020-03-30			4.8079	2020-04-13 00:00:00.0
265	231	30	1	2020-03-25	9.52559	2020-03-30 00:00:00.0	5.73765	2020-04-02 00:00:00.0		2020-04-06 00:00:00.0	231-02	66	0	Household	999. Unknown	2020-03-25	1			2020-03-30	7.7367	2020-04-11
266	231	30	1	2020-03-25	9.52559	2020-03-30 00:00:00.0	5.73765	2020-04-02 00:00:00.0		2020-04-06 00:00:00.0	231-03	65	1	Household	999. Unknown	2020-03-25	1	2020-04-07 00:00:00.0		2020-03-30				2020-04-13 00:00:00.0
267	231	30	1	2020-03-25	9.52559	2020-03-30 00:00:00.0	5.73765	2020-04-02 00:00:00.0		2020-04-06 00:00:00.0	231-04	39	0	Household	999. Unknown	2020-03-25	0			2020-03-30				2020-04-13 00:00:00.0
268	231	30	1	2020-03-25	9.52559	2020-03-30 00:00:00.0	5.73765	2020-04-02 00:00:00.0		2020-04-06 00:00:00.0	231-05	42	1	HCW	999. Unknown	2020-03-27	0			2020-03-30				2020-04-13 00:00:00.0
269	231	30	1	2020-03-25	9.52559	2020-03-30 00:00:00.0	5.73765	2020-04-02 00:00:00.0		2020-04-06 00:00:00.0	231-08	30	0	HCW	999. Unknown	2020-03-27	0			2020-03-30				2020-04-13 00:00:00.0
270	231	30	1	2020-03-25	9.52559	2020-03-30 00:00:00.0	5.73765	2020-04-02 00:00:00.0		2020-04-06 00:00:00.0	231-09	41	0	HCW	999. Unknown	2020-03-27	1	2020-04-01 00:00:00.0	5.174	2020-03-30				2020-04-13 00:00:00.0
271	233	30	1	2020-03-26	9.38953	2020-03-30 00:00:00.0	7.36425	2020-04-02 00:00:00.0		2020-04-06 00:00:00.0	233-01	34	0	Household	999. Unknown	2020-03-28	0			2020-03-30				2020-04-13 00:00:00.0
272	242	43	0	2020-03-27	7.7367	2020-03-31 00:00:00.0	8.1028	2020-04-03 00:00:00.0		2020-04-07 00:00:00.0	242-01	39	1	Household	0. Never	2020-03-27	0	2020-03-27 00:00:00.0		2020-03-31				2020-04-14 00:00:00.0
273	244	58	1	2020-03-25	7.23013	2020-03-31 00:00:00.0	4.21284	2020-04-03 00:00:00.0		2020-04-07 00:00:00.0	244-01	59	0	Household	1. Always	2020-03-27	1	2020-04-02 00:00:00.0		2020-03-31	4.4418	2020-04-07	4.4418	2020-04-14 00:00:00.0
274	244	58	1	2020-03-25	7.23013	2020-03-31 00:00:00.0	4.21284	2020-04-03 00:00:00.0		2020-04-07 00:00:00.0	244-02	46	1	HCW	1. Always	2020-03-26	0			2020-03-31				2020-04-14 00:00:00.0
275	253	25	1	2020-03-28	10.0835	2020-03-31 00:00:00.0	7.3604	2020-04-03 00:00:00.0		2020-04-07 00:00:00.0	253-01	25	1	HCW	1. Always	2020-03-27	0	2020-04-04 00:00:00.0		2020-03-31				2020-04-14 00:00:00.0
276	253	25	1	2020-03-28	10.0835	2020-03-31 00:00:00.0	7.3604	2020-04-03 00:00:00.0		2020-04-07 00:00:00.0	253-02	35	1	HCW	1. Always	2020-04-01	0			2020-04-03				2020-04-17 00:00:00.0
277	254	30	0	2020-03-27	8.39842	2020-03-31 00:00:00.0	6.63179	2020-04-04 00:00:00.0		2020-04-07 00:00:00.0	254-01	29	1	HCW	999. Unknown	2020-03-28	0	2020-04-03 00:00:00.0		2020-04-03				2020-04-17 00:00:00.0
278	256	56	1	2020-03-23	5.36107	2020-03-31 00:00:00.0	4.70658	2020-04-03 00:00:00.0		2020-04-07 00:00:00.0	256-01	34	0	Household	0. Never	2020-03-25	0			2020-03-31				2020-04-14 00:00:00.0
279	265	64	1	2020-03-28	6.5644	2020-04-01 00:00:00.0	5.24052	2020-04-03 00:00:00.0		2020-04-08 00:00:00.0	265-01	43	1	HCW	1. Always	2020-03-28	0			2020-04-01				2020-04-15 00:00:00.0
280	265	64	1	2020-03-28	6.5644	2020-04-01 00:00:00.0	5.24052	2020-04-03 00:00:00.0		2020-04-08 00:00:00.0	265-02	56	1	Household	0. Never	2020-03-28	0	2020-04-03 00:00:00.0		2020-04-01				2020-04-15 00:00:00.0
281	265	64	1	2020-03-28	6.5644	2020-04-01 00:00:00.0	5.24052	2020-04-03 00:00:00.0		2020-04-08 00:00:00.0	265-03	57	0	Household	0. Never	2020-03-28	0			2020-04-01				2020-04-15 00:00:00.0
282	266	35	1	2020-03-26	6.94673	2020-04-01 00:00:00.0	5.29905	2020-04-04 00:00:00.0		2020-04-08 00:00:00.0	266-01	39	1	HCW	999. Unknown	2020-03-30	0			2020-04-01				2020-04-15 00:00:00.0
283	266	35	1	2020-03-26	6.94673	2020-04-01 00:00:00.0	5.29905	2020-04-04 00:00:00.0		2020-04-08 00:00:00.0	266-03	42	1	HCW	1. Always	2020-03-30	0			2020-04-01				2020-04-15 00:00:00.0
284	266	35	1	2020-03-26	6.94673	2020-04-01 00:00:00.0	5.29905	2020-04-04 00:00:00.0		2020-04-08 00:00:00.0	266-06	38	1	HCW	1. Always	2020-03-30	1	2020-04-08 00:00:00.0	4.0757	2020-04-01				2020-04-15 00:00:00.0
285	266	35	1	2020-03-26	6.94673	2020-04-01 00:00:00.0	5.29905	2020-04-04 00:00:00.0		2020-04-08 00:00:00.0	266-07	40	1	HCW	999. Unknown	2020-03-30	0			2020-04-01				2020-04-15 00:00:00.0
286	266	35	1	2020-03-26	6.94673	2020-04-01 00:00:00.0	5.29905	2020-04-04 00:00:00.0		2020-04-08 00:00:00.0	266-08	56	1	HCW	1. Always	2020-03-30	0	2020-04-02 00:00:00.0		2020-04-01				2020-04-15 00:00:00.0
287	266	35	1	2020-03-26	6.94673	2020-04-01 00:00:00.0	5.29905	2020-04-04 00:00:00.0		2020-04-08 00:00:00.0	266-09	22	1	HCW	1. Always	2020-03-30	0			2020-04-04				2020-04-18 00:00:00.0
288	266	35	1	2020-03-26	6.94673	2020-04-01 00:00:00.0	5.29905	2020-04-04 00:00:00.0		2020-04-08 00:00:00.0	266-11	37	0	Household	0. Never	2020-03-30	0			2020-04-01				2020-04-15 00:00:00.0
289	266	35	1	2020-03-26	6.94673	2020-04-01 00:00:00.0	5.29905	2020-04-04 00:00:00.0		2020-04-08 00:00:00.0	266-13	50	1	HCW	1. Always	2020-04-01	1	2020-04-04 00:00:00.0		2020-04-02	11.0316	2020-04-10
290	273	30	1	2020-03-26	6.10083	2020-04-01 00:00:00.0	4.11481	2020-04-04 00:00:00.0		2020-04-08 00:00:00.0	273-01	27	1	Household			0
291	273	30	1	2020-03-26	6.10083	2020-04-01 00:00:00.0	4.11481	2020-04-04 00:00:00.0		2020-04-08 00:00:00.0	273-02	41	0	Household	999. Unknown	2020-03-27	0			2020-04-01				2020-04-15 00:00:00.0
292	275	34	0	2020-03-30	8.88543	2020-04-01 00:00:00.0	7.95515	2020-04-04 00:00:00.0		2020-04-08 00:00:00.0	275-01	27	1	Household	1. Always	2020-03-30	0			2020-04-01				2020-04-15 00:00:00.0
293	275	34	0	2020-03-30	8.88543	2020-04-01 00:00:00.0	7.95515	2020-04-04 00:00:00.0		2020-04-08 00:00:00.0	275-02	37	0	Household	1. Always	2020-03-30	1	2020-04-02 00:00:00.0	8.3724	2020-04-01	7.93576		4.3022	2020-04-15 00:00:00.0
294	275	34	0	2020-03-30	8.88543	2020-04-01 00:00:00.0	7.95515	2020-04-04 00:00:00.0		2020-04-08 00:00:00.0	275-03	20	1	Household	1. Always	2020-03-30	1	2020-04-02 00:00:00.0		2020-04-01	9.9333	2020-04-08	4.4418	2020-04-15 00:00:00.0
295	276	53	0	2020-03-30	10.0873	2020-04-01 00:00:00.0	6.75928	2020-04-04 00:00:00.0		2020-04-08 00:00:00.0	276-01	46	1	Household	1. Always	2020-03-29	0			2020-04-01				2020-04-15 00:00:00.0
296	277	41	0	2020-03-27	7.53966	2020-04-01 00:00:00.0		2020-04-04 00:00:00.0		2020-04-08 00:00:00.0	277-01	38	1	Household	0. Never	2020-03-27	0	2020-04-03 00:00:00.0		2020-04-01		2020-04-08		2020-04-15 00:00:00.0
297	277	41	0	2020-03-27	7.53966	2020-04-01 00:00:00.0		2020-04-04 00:00:00.0		2020-04-08 00:00:00.0	277-02	84	0	Household	0. Never	2020-03-27	0			2020-04-01				2020-04-15 00:00:00.0
298	277	41	0	2020-03-27	7.53966	2020-04-01 00:00:00.0		2020-04-04 00:00:00.0		2020-04-08 00:00:00.0	277-03	77	1	Household	0. Never	2020-03-27	0			2020-04-01				2020-04-15 00:00:00.0
299	278	26	1	2020-03-27	7.33996	2020-04-01 00:00:00.0	9.73036	2020-04-04 00:00:00.0		2020-04-09 00:00:00.0	278-01	30	0	HCW	1. Always	2020-03-27	0			2020-04-01				2020-04-15 00:00:00.0
300	280	44	1	2020-03-29	8.33476	2020-04-01 00:00:00.0	6.24084	2020-04-04 00:00:00.0		2020-04-08 00:00:00.0	280-01	51	0	Household	0. Never	2020-03-29	0			2020-04-01				2020-04-15 00:00:00.0
301	280	44	1	2020-03-29	8.33476	2020-04-01 00:00:00.0	6.24084	2020-04-04 00:00:00.0		2020-04-08 00:00:00.0	280-02	68	1	Household	0. Never	2020-03-29	1			2020-04-01				2020-04-15 00:00:00.0
302	280	44	1	2020-03-29	8.33476	2020-04-01 00:00:00.0	6.24084	2020-04-04 00:00:00.0		2020-04-08 00:00:00.0	280-03	65	0	Household	0. Never	2020-03-29	0	2020-03-31 00:00:00.0		2020-04-01				2020-04-15 00:00:00.0
303	281	37	1	2020-03-29	9.85109	2020-04-01 00:00:00.0	9.23555	2020-04-04 00:00:00.0		2020-04-08 00:00:00.0	281-01	36	0	Household	1. Always	2020-03-29	0			2020-04-01				2020-04-15 00:00:00.0
304	282	29	1	2020-03-27	6.4146	2020-04-01 00:00:00.0	4.43962	2020-04-04 00:00:00.0		2020-04-08 00:00:00.0	282-01	35	0	Household	0. Never	2020-03-28	0			2020-04-01				2020-04-15 00:00:00.0
305	288	48	1	2020-03-29		2020-04-01 00:00:00.0	8.4689	2020-04-04 00:00:00.0		2020-04-07 00:00:00.0	288-01	51	0	Household	999. Unknown	2020-03-29	1	2020-04-02 00:00:00.0	4.00523	2020-04-01	6.65232	2020-04-08	6.84315	2020-04-14 00:00:00.0
306	291	26	1	2020-03-28	4.92807	2020-04-01 00:00:00.0	5.02241	2020-04-04 00:00:00.0		2020-04-08 00:00:00.0	291-01	27	0	HCW	1. Always	2020-03-28	0			2020-04-01				2020-04-15 00:00:00.0
307	296	46	1	2020-03-28	9.84871	2020-04-02 00:00:00.0	6.81952	2020-04-05 00:00:00.0		2020-04-09 00:00:00.0	296-01	47	0	Household	999. Unknown	2020-03-28	1		9.5672	2020-04-02				2020-04-16 00:00:00.0
308	299	60	0	2020-03-28	6.41882	2020-04-02 00:00:00.0	5.62654	2020-04-05 00:00:00.0		2020-04-09 00:00:00.0	299-01	61	1	Household	0. Never	2020-03-29	0			2020-04-02				2020-04-16 00:00:00.0
309	299	60	0	2020-03-28	6.41882	2020-04-02 00:00:00.0	5.62654	2020-04-05 00:00:00.0		2020-04-09 00:00:00.0	299-02	36	1	HCW	1. Always	2020-04-01	0			2020-04-03				2020-04-17 00:00:00.0
310	303	60	1	2020-03-29	7.02347	2020-04-02 00:00:00.0	6.65809	2020-04-05 00:00:00.0		2020-04-09 00:00:00.0	303-01	60	1	HCW	1. Always	2020-03-29	0			2020-04-02				2020-04-16 00:00:00.0
311	303	60	1	2020-03-29	7.02347	2020-04-02 00:00:00.0	6.65809	2020-04-05 00:00:00.0		2020-04-09 00:00:00.0	303-02	60	1	HCW	1. Always	2020-03-29	0	2020-03-26 00:00:00.0		2020-04-02				2020-04-16 00:00:00.0
312	304	48	1	2020-03-30	6.30652	2020-04-02 00:00:00.0	4.94519	2020-04-05 00:00:00.0		2020-04-09 00:00:00.0	304-01	63	0	HCW	0. Never	2020-03-30	0			2020-04-02				2020-04-16 00:00:00.0
313	304	48	1	2020-03-30	6.30652	2020-04-02 00:00:00.0	4.94519	2020-04-05 00:00:00.0		2020-04-09 00:00:00.0	304-02	51	1	HCW	1. Always	2020-03-30	0			2020-04-02				2020-04-16 00:00:00.0
314	305	51	1	2020-03-30	7.0045	2020-04-02 00:00:00.0	7.3706	2020-04-05 00:00:00.0		2020-04-09 00:00:00.0	305-01	24	1	Household	0. Never	2020-03-30	0			2020-04-02				2020-04-16 00:00:00.0
315	305	51	1	2020-03-30	7.0045	2020-04-02 00:00:00.0	7.3706	2020-04-05 00:00:00.0		2020-04-09 00:00:00.0	305-02	19	1	Household	0. Never	2020-03-31	0			2020-04-02				2020-04-16 00:00:00.0
316	306	61	0	2020-03-31	10.2994	2020-04-03 00:00:00.0	9.9333	2020-04-06 00:00:00.0		2020-04-10 00:00:00.0	306-01	57	1	Household	999. Unknown	2020-03-31	1		10.2994	2020-04-03				2020-04-17 00:00:00.0
317	306	61	0	2020-03-31	10.2994	2020-04-03 00:00:00.0	9.9333	2020-04-06 00:00:00.0		2020-04-10 00:00:00.0	306-02	21	0	Household	999. Unknown	2020-03-31	1	2020-04-04 00:00:00.0		2020-04-03	10.666	2020-04-09
318	307	73	1	2020-03-28	10.2994	2020-04-02 00:00:00.0					307-01	55	0	HCW	1. Always	2020-03-28	0			2020-04-02				2020-04-15 00:00:00.0
319	312	37	0	2020-03-29	7.90085	2020-04-02 00:00:00.0	7.20955	2020-04-05 00:00:00.0			312-01	41	1	Household	0. Never	2020-03-29	0			2020-04-02				2020-04-16 00:00:00.0
320	312	37	0	2020-03-29	7.90085	2020-04-02 00:00:00.0	7.20955	2020-04-05 00:00:00.0			312-02	28	0	HCW	1. Always	2020-03-29	0			2020-04-03				2020-04-17 00:00:00.0
321	314	31	0	2020-03-30	8.99339	2020-04-02 00:00:00.0	8.40501	2020-04-05 00:00:00.0		2020-04-09 00:00:00.0	314-01	30	0	Household	1. Always	2020-04-02	0			2020-04-02				2020-04-16 00:00:00.0
322	314	31	0	2020-03-30	8.99339	2020-04-02 00:00:00.0	8.40501	2020-04-05 00:00:00.0		2020-04-09 00:00:00.0	314-02	52	0	HCW	1. Always	2020-03-27	0			2020-04-03				2020-04-17 00:00:00.0
323	314	31	0	2020-03-30	8.99339	2020-04-02 00:00:00.0	8.40501	2020-04-05 00:00:00.0		2020-04-09 00:00:00.0	314-03	32	0	HCW	1. Always	2020-03-30	0			2020-04-03				2020-04-17 00:00:00.0
324	314	31	0	2020-03-30	8.99339	2020-04-02 00:00:00.0	8.40501	2020-04-05 00:00:00.0		2020-04-09 00:00:00.0	314-04	61	1	HCW	1. Always	2020-03-18	0			2020-04-03				2020-04-17 00:00:00.0
325	314	31	0	2020-03-30	8.99339	2020-04-02 00:00:00.0	8.40501	2020-04-05 00:00:00.0		2020-04-09 00:00:00.0	314-05	62	1	HCW	1. Always	2020-03-30	0			2020-04-03				2020-04-17 00:00:00.0
326	315	58	1	2020-03-25	5.92686	2020-04-02 00:00:00.0	5.03127	2020-04-05 00:00:00.0		2020-04-09 00:00:00.0	315-01	24	1	Household	1. Always	2020-03-29	0			2020-04-02				2020-04-16 00:00:00.0
327	315	58	1	2020-03-25	5.92686	2020-04-02 00:00:00.0	5.03127	2020-04-05 00:00:00.0		2020-04-09 00:00:00.0	315-02	63	0	Household	1. Always	2020-03-29	0			2020-04-02				2020-04-17 00:00:00.0
328	317	39	0	2020-03-29	7.62705	2020-04-02 00:00:00.0	5.46365	2020-04-05 00:00:00.0		2020-04-09 00:00:00.0	317-01	37	1	HCW	1. Always	2020-03-17	0			2020-04-03
329	322	55	1	2020-03-30	5.33241	2020-04-03 00:00:00.0		2020-04-06 00:00:00.0		2020-04-10 00:00:00.0	322-01	56	0	Household	0. Never	2020-03-30	0			2020-04-03				2020-04-17 00:00:00.0
330	322	55	1	2020-03-30	5.33241	2020-04-03 00:00:00.0		2020-04-06 00:00:00.0		2020-04-10 00:00:00.0	322-02	23	0	Household	0. Never	2020-04-30	0			2020-04-03				2020-04-17 00:00:00.0
331	327	44	1	2020-03-31	9.18556	2020-04-03 00:00:00.0	7.54186	2020-04-06 00:00:00.0		2020-04-09 00:00:00.0	327-01	32	1	Household	999. Unknown	2020-03-29	0			2020-04-03				2020-04-17 00:00:00.0
332	327	44	1	2020-03-31	9.18556	2020-04-03 00:00:00.0	7.54186	2020-04-06 00:00:00.0		2020-04-09 00:00:00.0	327-03	30	0	HCW	1. Always	2020-03-27	0			2020-04-03				2020-04-17 00:00:00.0
333	327	44	1	2020-03-31	9.18556	2020-04-03 00:00:00.0	7.54186	2020-04-06 00:00:00.0		2020-04-09 00:00:00.0	327-04	30	1	HCW	1. Always	2020-03-23	0			2020-04-03				2020-04-17 00:00:00.0
334	327	44	1	2020-03-31	9.18556	2020-04-03 00:00:00.0	7.54186	2020-04-06 00:00:00.0		2020-04-09 00:00:00.0	327-07	28	0	HCW	1. Always	2020-03-29	0			2020-04-03				2020-04-17 00:00:00.0
335	328	28	1	2020-03-30	4.29566	2020-04-02 00:00:00.0	5.13804	2020-04-05 00:00:00.0		2020-04-09 00:00:00.0	328-01	29	1	Household	999. Unknown	2020-03-27	0			2020-04-02				2020-04-16 00:00:00.0
336	328	28	1	2020-03-30	4.29566	2020-04-02 00:00:00.0	5.13804	2020-04-05 00:00:00.0		2020-04-09 00:00:00.0	328-02	30	1	Unknown	999. Unknown	2020-03-27	0			2020-04-02				2020-04-16 00:00:00.0
337	367	29	1	2020-03-30	7.14199	2020-04-04 00:00:00.0	5.66813	2020-04-07 00:00:00.0		2020-04-11 00:00:00.0	367-01	29	1	Household	0. Never	2020-03-31	0			2020-04-04				2020-04-18 00:00:00.0
338	368	54	1	2020-03-31	5.16728	2020-04-04 00:00:00.0	4.73033	2020-04-07 00:00:00.0		2020-04-11 00:00:00.0	368-01	59	0	Household	999. Unknown	2020-03-31	1	2020-04-10 00:00:00.0	4.0757	2020-04-04				2020-04-18 00:00:00.0
339	368	54	1	2020-03-31	5.16728	2020-04-04 00:00:00.0	4.73033	2020-04-07 00:00:00.0		2020-04-11 00:00:00.0	368-02	23	1	Household	999. Unknown	2020-03-31	0			2020-04-04				2020-04-18 00:00:00.0
340	370	32	0		9.68342	2020-04-04 00:00:00.0	9.10514	2020-04-07 00:00:00.0		2020-04-11 00:00:00.0	370-01	54	1	Household	1. Always	2020-03-30	1	2020-04-05 00:00:00.0	4.8079	2020-04-04	8.1028	2020-04-11	4.4418	2020-04-18 00:00:00.0
341	373	51	1	2020-03-30	9.03214	2020-04-04 00:00:00.0	8.88517	2020-04-07 00:00:00.0	5.15396	2020-04-11 00:00:00.0	373-02	18	1	Household	0. Never	2020-03-27	0	2020-04-07 00:00:00.0		2020-04-04				2020-04-18 00:00:00.0
342	373	51	1	2020-03-30	9.03214	2020-04-04 00:00:00.0	8.88517	2020-04-07 00:00:00.0	5.15396	2020-04-11 00:00:00.0	373-03	24	0	Household	0. Never	2020-03-27	0			2020-04-04				2020-04-18 00:00:00.0
343	374	40	1	2020-04-01	7.5027	2020-04-04 00:00:00.0	6.08932	2020-04-07 00:00:00.0		2020-04-11 00:00:00.0	374-01	41	0	Household	999. Unknown	2020-04-02	0			2020-04-04				2020-04-18 00:00:00.0
344	376	22	1	2020-03-31		2020-04-04 00:00:00.0	10.0024	2020-04-07 00:00:00.0	5.5401	2020-04-11 00:00:00.0	376-01	27	0	Household	0. Never	2020-04-04	0			2020-04-04				2020-04-18 00:00:00.0
345	384	52	1	2020-03-29	10.2994	2020-04-04 00:00:00.0	5.9062	2020-04-07 00:00:00.0	5.174	2020-04-11 00:00:00.0	384-01	22	0	Household	1. Always	2020-03-29	0			2020-04-04				2020-04-18 00:00:00.0
346	385	30	1	2020-03-31	7.62431	2020-04-04 00:00:00.0	6.96361	2020-04-07 00:00:00.0		2020-04-11 00:00:00.0	385-01	35	0	Household	1. Always	2020-04-03	0	2020-04-06 00:00:00.0		2020-04-04				2020-04-18 00:00:00.0
347	385	30	1	2020-03-31	7.62431	2020-04-04 00:00:00.0	6.96361	2020-04-07 00:00:00.0		2020-04-11 00:00:00.0	385-03	34	1	HCW	999. Unknown	2020-04-03	0			2020-04-04				2020-04-18 00:00:00.0
348	387	25	1			2020-04-04 00:00:00.0		2020-04-07 00:00:00.0		2020-04-11 00:00:00.0	387-01	57	0	Household	1. Always	2020-03-31	1			2020-04-04			4.4418	2020-04-18 00:00:00.0
349	393	55	1	2020-03-31	9.75388	2020-04-05 00:00:00.0	8.02052	2020-04-08 00:00:00.0		2020-04-12 00:00:00.0	393-01	56	0	Unknown	999. Unknown	2020-04-02	1	2020-04-04 00:00:00.0	6.35596	2020-04-04			4.61784	2020-04-18 00:00:00.0
350	394	40	0	2020-03-30	6.96684	2020-04-05 00:00:00.0	4.10364	2020-04-08 00:00:00.0	4.02076	2020-04-12 00:00:00.0	394-01	40	1	Household	1. Always	2020-03-30	1			2020-04-05				2020-04-19 00:00:00.0
351	396	60	1	2020-03-30	6.53218	2020-04-05 00:00:00.0	5.36092	2020-04-08 00:00:00.0		2020-04-12 00:00:00.0	396-01	28	0	Household	0. Never	2020-04-02	0			2020-04-05				2020-04-19 00:00:00.0
352	396	60	1	2020-03-30	6.53218	2020-04-05 00:00:00.0	5.36092	2020-04-08 00:00:00.0		2020-04-12 00:00:00.0	396-02	56	0	Household	1. Always	2020-04-02	0			2020-04-05				2020-04-19 00:00:00.0
353	400	43	0	2020-04-01	5.83918	2020-04-05 00:00:00.0	7.09984	2020-04-08 00:00:00.0		2020-04-12 00:00:00.0	400-01	55	1	Household	1. Always	2020-03-31	0			2020-04-05				2020-04-19 00:00:00.0
354	407	57	0	2020-04-01	6.22359	2020-04-05 00:00:00.0	8.26658	2020-04-08 00:00:00.0		2020-04-12 00:00:00.0	407-01	52	1	Household	0. Never	2020-04-01	0	2020-04-08 00:00:00.0		2020-04-05				2020-04-19 00:00:00.0
355	407	57	0	2020-04-01	6.22359	2020-04-05 00:00:00.0	8.26658	2020-04-08 00:00:00.0		2020-04-12 00:00:00.0	407-02	19	0	Household	0. Never	2020-04-01	0	2020-04-10 00:00:00.0		2020-04-05				2020-04-19 00:00:00.0
356	409	42	0	2020-03-30	5.10974	2020-04-05 00:00:00.0	4.09019	2020-04-08 00:00:00.0		2020-04-12 00:00:00.0	409-01	41	1	HCW	1. Always	2020-04-03	0			2020-04-05				2020-04-20 00:00:00.0
357	409	42	0	2020-03-30	5.10974	2020-04-05 00:00:00.0	4.09019	2020-04-08 00:00:00.0		2020-04-12 00:00:00.0	409-02	41	0	HCW	1. Always	2020-04-03	0			2020-04-06				2020-04-22 00:00:00.0
358	409	42	0	2020-03-30	5.10974	2020-04-05 00:00:00.0	4.09019	2020-04-08 00:00:00.0		2020-04-12 00:00:00.0	409-04	41	1	HCW	1. Always	2020-04-02	1	2020-04-06 00:00:00.0	5.9062	2020-04-05				2020-04-19 00:00:00.0
359	409	42	0	2020-03-30	5.10974	2020-04-05 00:00:00.0	4.09019	2020-04-08 00:00:00.0		2020-04-12 00:00:00.0	409-05	52	1	HCW	1. Always	2020-04-03	0			2020-04-06				2020-04-20 00:00:00.0
360	409	42	0	2020-03-30	5.10974	2020-04-05 00:00:00.0	4.09019	2020-04-08 00:00:00.0		2020-04-12 00:00:00.0	409-07	41	1	HCW	999. Unknown	2020-04-03	0			2020-04-06				2020-04-21 00:00:00.0
361	409	42	0	2020-03-30	5.10974	2020-04-05 00:00:00.0	4.09019	2020-04-08 00:00:00.0		2020-04-12 00:00:00.0	409-09	42	1	HCW	1. Always	2020-04-03	0	2020-04-06 00:00:00.0		2020-04-06				2020-04-20 00:00:00.0
362	409	42	0	2020-03-30	5.10974	2020-04-05 00:00:00.0	4.09019	2020-04-08 00:00:00.0		2020-04-12 00:00:00.0	409-13	39	0	HCW	1. Always	2020-04-03	0	2020-04-07 00:00:00.0		2020-04-06				2020-04-20 00:00:00.0
363	409	42	0	2020-03-30	5.10974	2020-04-05 00:00:00.0	4.09019	2020-04-08 00:00:00.0		2020-04-12 00:00:00.0	409-14	34	1	HCW	1. Always	2020-04-03	0			2020-04-06				2020-04-20 00:00:00.0
364	414	25	1	2020-04-02	8.91089	2020-04-05 00:00:00.0	7.61671	2020-04-08 00:00:00.0	5.15311	2020-04-12 00:00:00.0	414-01	57	0	Household	1. Always	2020-04-02	1	2020-04-10 00:00:00.0	4.4418	2020-04-05	6.2723	2020-04-14	4.4418	2020-04-19 00:00:00.0
365	414	25	1	2020-04-02	8.91089	2020-04-05 00:00:00.0	7.61671	2020-04-08 00:00:00.0	5.15311	2020-04-12 00:00:00.0	414-02	59	1	Household	1. Always	2020-04-02	1	2020-04-11 00:00:00.0	5.174	2020-04-05	9.5672	2020-04-14	7.3706	2020-04-19 00:00:00.0
366	414	25	1	2020-04-02	8.91089	2020-04-05 00:00:00.0	7.61671	2020-04-08 00:00:00.0	5.15311	2020-04-12 00:00:00.0	414-03	23	1	HCW	0. Never	2020-04-02	1	2020-04-08 00:00:00.0	8.63047	2020-04-06	7.35656	2020-04-11		2020-04-19 00:00:00.0
367	414	25	1	2020-04-02	8.91089	2020-04-05 00:00:00.0	7.61671	2020-04-08 00:00:00.0	5.15311	2020-04-12 00:00:00.0	414-04	26	1	HCW	999. Unknown	2020-04-02	0
368	415	31	1	2020-04-03	8.96278	2020-04-05 00:00:00.0	6.85789	2020-04-08 00:00:00.0	5.31998	2020-04-12 00:00:00.0	415-01	32	0	Household	0. Never	2020-04-03	0			2020-04-05				2020-04-19 00:00:00.0
369	434	25	1	2020-03-30	9.17055	2020-04-06 00:00:00.0	8.17302	2020-04-09 00:00:00.0		2020-04-13 00:00:00.0	434-01	56	1	Household	999. Unknown	2020-04-04	0			2020-04-06				2020-04-20 00:00:00.0
370	437	42	0	2020-04-01	7.31892	2020-04-06 00:00:00.0	5.13868	2020-04-09 00:00:00.0		2020-04-13 00:00:00.0	437-01	54	0	HCW	1. Always	2020-04-01	0			2020-04-06				2020-04-20 00:00:00.0
371	437	42	0	2020-04-01	7.31892	2020-04-06 00:00:00.0	5.13868	2020-04-09 00:00:00.0		2020-04-13 00:00:00.0	437-02	46	0	HCW	1. Always	2020-04-01	0			2020-04-06				2020-04-20 00:00:00.0
372	437	42	0	2020-04-01	7.31892	2020-04-06 00:00:00.0	5.13868	2020-04-09 00:00:00.0		2020-04-13 00:00:00.0	437-03	41	1	Household	999. Unknown	2020-04-01	1		4.8079	2020-04-06				2020-04-20 00:00:00.0
373	440	52	0	2020-04-02	9.07161	2020-04-06 00:00:00.0	7.13535	2020-04-09 00:00:00.0		2020-04-13 00:00:00.0	440-01	53	1	Household	0. Never	2020-04-02	1	0020-04-17 00:00:00.0		2020-04-06			5.174	2020-04-20 00:00:00.0
374	440	52	0	2020-04-02	9.07161	2020-04-06 00:00:00.0	7.13535	2020-04-09 00:00:00.0		2020-04-13 00:00:00.0	440-02	19	1	Household	0. Never	2020-04-02	1	2020-04-15 00:00:00.0		2020-04-06			4.8079	2020-04-21 00:00:00.0
375	440	52	0	2020-04-02	9.07161	2020-04-06 00:00:00.0	7.13535	2020-04-09 00:00:00.0		2020-04-13 00:00:00.0	440-03	25	1	HCW	1. Always	2020-04-03	0			2020-04-06				2020-04-20 00:00:00.0
376	440	52	0	2020-04-02	9.07161	2020-04-06 00:00:00.0	7.13535	2020-04-09 00:00:00.0		2020-04-13 00:00:00.0	440-05	38	0	HCW	1. Always	2020-04-03	0			2020-04-07				2020-04-21 00:00:00.0
377	442	52	1	2020-04-02	9.9333	2020-04-06 00:00:00.0	8.1225	2020-04-09 00:00:00.0	4.8079	2020-04-14 00:00:00.0	442-01	46	0	Household	999. Unknown	2020-04-02	0			2020-04-06				2020-04-20 00:00:00.0
378	450	46	1	2020-04-01	7.99313	2020-04-06 00:00:00.0	6.80628	2020-04-09 00:00:00.0	5.69047	2020-04-13 00:00:00.0	450-01	57	0	Household	1. Always	2020-04-03	0			2020-04-06				2020-04-20 00:00:00.0
379	452	33	0	2020-04-02	7.0045	2020-04-06 00:00:00.0				2020-04-13 00:00:00.0	452-01	46	1	Household	1. Always	2020-04-02	0			2020-04-06				2020-04-20 00:00:00.0
380	453	24	0	2020-04-03	9.5969	2020-04-07 00:00:00.0	8.42678	2020-04-10 00:00:00.0		2020-04-14 00:00:00.0	453-01	24	1	Household	0. Never	2020-04-07	0			2020-04-07				2020-04-21 00:00:00.0
381	456	46	0						4.4418		456-01	45	0	Household	1. Always	2020-04-04	1	2020-04-12 00:00:00.0		2020-04-07	10.2994	2020-04-14	9.2011	2020-04-21 00:00:00.0
382	456	46	0						4.4418		456-02	82	0	Household	1. Always	2020-04-04	1	2020-04-08 00:00:00.0		2020-04-07	10.6655	2020-04-14	7.3706	2020-04-21 00:00:00.0
383	456	46	0						4.4418		456-03	78	1	Household	0. Never	2020-04-03	1	2020-04-11 00:00:00.0	8.72255	2020-04-07	9.5848	2020-04-14	6.13546	2020-04-21 00:00:00.0
384	456	46	0						4.4418		456-05	50	1	HCW	1. Always	2020-04-03	0			2020-04-08				2020-04-30 00:00:00.0
385	456	46	0						4.4418		456-06	53	1	HCW	1. Always	2020-04-03	0	2020-04-01 00:00:00.0		2020-04-08
386	456	46	0						4.4418		456-08	52	1	HCW	1. Always	2020-04-03	1	2020-04-10 00:00:00.0		2020-04-08		2020-04-18		2020-04-22 00:00:00.0
387	456	46	0						4.4418		456-09	50	1	HCW	1. Always	2020-04-05	0			2020-04-08				2020-04-22 00:00:00.0
388	456	46	0						4.4418		456-10	65	1	HCW	1. Always	2020-04-03	0	2020-04-21 00:00:00.0		2020-04-08				2020-04-22 00:00:00.0
389	456	46	0						4.4418		456-11	36	1	HCW	1. Always	2020-03-27	0	2020-04-22 00:00:00.0		2020-04-08				2020-04-22 00:00:00.0
390	456	46	0						4.4418		456-12	27	0	HCW	1. Always	2020-04-01	0	2020-04-09 00:00:00.0		2020-04-08				2020-04-22 00:00:00.0
391	456	46	0						4.4418		456-13	59	1	HCW	1. Always	2020-04-03	0			2020-04-08				2020-04-22 00:00:00.0
392	456	46	0						4.4418		456-14	50	1	HCW	1. Always	2020-04-03	0			2020-04-08				2020-04-22 00:00:00.0
393	456	46	0						4.4418		456-15	64	0	HCW	1. Always	2020-04-03	0	2020-04-10 00:00:00.0		2020-04-08				2020-04-22 00:00:00.0
394	456	46	0						4.4418		456-16	43	1	HCW	1. Always	2020-04-03	1		4.0757	2020-04-08				2020-04-22 00:00:00.0
395	456	46	0						4.4418		456-17	25	1	HCW	1. Always	2020-04-03	0	2020-04-10 00:00:00.0		2020-04-08				2020-04-22 00:00:00.0
396	456	46	0						4.4418		456-18	64	1	HCW	1. Always	2020-04-03	0			2020-04-08				2020-04-22 00:00:00.0
397	456	46	0						4.4418		456-19	49	1	HCW	1. Always	2020-04-03	0			2020-04-09				2020-04-23 00:00:00.0
398	459	61	1	2020-04-02		2020-04-07 00:00:00.0	6.2723	2020-04-10 00:00:00.0	5.5401	2020-04-14 00:00:00.0	459-01	91	1	Household	0. Never	2020-04-06	1	2020-04-07 00:00:00.0	6.58178	2020-04-07			6.55439	2020-04-21 00:00:00.0
399	462	50	1	2020-04-02	9.82184	2020-04-07 00:00:00.0	8.25163	2020-04-10 00:00:00.0	6.6384	2020-04-14 00:00:00.0	462-01	37	1	HCW	1. Always	2020-04-02	0	2020-04-10 00:00:00.0		2020-04-07				2020-04-21 00:00:00.0
400	462	50	1	2020-04-02	9.82184	2020-04-07 00:00:00.0	8.25163	2020-04-10 00:00:00.0	6.6384	2020-04-14 00:00:00.0	462-02	36	1	HCW	1. Always	2020-04-02	0			2020-04-07				2020-04-21 00:00:00.0
401	463	32	0	2020-04-04	8.79096	2020-04-07 00:00:00.0	4.12154	2020-04-10 00:00:00.0	4.8079	2020-04-14 00:00:00.0	463-01	21	0	Household	0. Never	2020-04-04	1		7.3706	2020-04-07				2020-04-21 00:00:00.0
402	463	32	0	2020-04-04	8.79096	2020-04-07 00:00:00.0	4.12154	2020-04-10 00:00:00.0	4.8079	2020-04-14 00:00:00.0	463-02	37	0	Household	0. Never	2020-04-05	1		7.3706	2020-04-07
403	465	31	0	2020-04-04	10.3164	2020-04-07 00:00:00.0	6.58575	2020-04-10 00:00:00.0	4.8079	2020-04-14 00:00:00.0	465-01	34	0	Household	1. Always	2020-04-07	1		4.38007	2020-04-07				2020-04-21 00:00:00.0
404	466	24	1	2020-04-01	4.94823	2020-04-07 00:00:00.0		2020-04-10 00:00:00.0		2020-04-14 00:00:00.0	466-01	64	1	Household	1. Always	2020-04-01	0			2020-04-07				2020-04-21 00:00:00.0
405	466	24	1	2020-04-01	4.94823	2020-04-07 00:00:00.0		2020-04-10 00:00:00.0		2020-04-14 00:00:00.0	466-02	22	0	Household	1. Always	2020-04-01	0			2020-04-07				2020-04-21 00:00:00.0
406	466	24	1	2020-04-01	4.94823	2020-04-07 00:00:00.0		2020-04-10 00:00:00.0		2020-04-14 00:00:00.0	466-03	63	0	Household	0. Never	2020-04-01	0			2020-04-07				2020-04-21 00:00:00.0
407	467	59	1	2020-04-04	8.89447	2020-04-07 00:00:00.0	8.69588	2020-04-10 00:00:00.0	5.9062	2020-04-14 00:00:00.0	467-01	61	0	Household	0. Never	2020-04-07	1	2020-04-13 00:00:00.0		2020-04-07	8.4689	2020-04-18	8.835	2020-04-21 00:00:00.0
408	467	59	1	2020-04-04	8.89447	2020-04-07 00:00:00.0	8.69588	2020-04-10 00:00:00.0	5.9062	2020-04-14 00:00:00.0	467-02	47	0	Household	1. Always	2020-04-04	0			2020-04-07				2020-04-21 00:00:00.0
409	469	36	1	2020-04-02	5.174	2020-04-07 00:00:00.0		2020-04-10 00:00:00.0		2020-04-14 00:00:00.0	469-01	33	0	Household	1. Always	2020-04-02	0			2020-04-07				2020-04-21 00:00:00.0
410	474	26	0	2020-04-03	7.96031	2020-04-08 00:00:00.0	5.77878	2020-04-11 00:00:00.0	4.5708	2020-04-15 00:00:00.0	474-01	57	0	Household	1. Always	2020-04-03	0			2020-04-08				2020-04-22 00:00:00.0
411	474	26	0	2020-04-03	7.96031	2020-04-08 00:00:00.0	5.77878	2020-04-11 00:00:00.0	4.5708	2020-04-15 00:00:00.0	474-02	55	1	Household	0. Never	2020-04-03	0			2020-04-08				2020-04-22 00:00:00.0
412	474	26	0	2020-04-03	7.96031	2020-04-08 00:00:00.0	5.77878	2020-04-11 00:00:00.0	4.5708	2020-04-15 00:00:00.0	474-03	24	1	Household	0. Never	2020-04-02	0			2020-04-08				2020-04-22 00:00:00.0
413	475	32	1	2020-04-03	7.0045	2020-04-07 00:00:00.0	5.9062	2020-04-10 00:00:00.0	5.9062	2020-04-14 00:00:00.0	475-01	45	0	Household	1. Always	2020-04-03	0	2020-04-05 00:00:00.0		2020-04-07				2020-04-21 00:00:00.0
414	477	34	1	2020-04-04	7.7367	2020-04-07 00:00:00.0	6.6384	2020-04-10 00:00:00.0		2020-04-14 00:00:00.0	477-01	45	1	Household	1. Always	2020-04-04	1	2020-04-08 00:00:00.0	7.18459	2020-04-07			4.01589	2020-04-21 00:00:00.0
415	479	54	1	2020-04-01	8.75759	2020-04-07 00:00:00.0	7.07861	2020-04-10 00:00:00.0	5.5401	2020-04-14 00:00:00.0	479-01	25	0	Household	0. Never	2020-04-03	0			2020-04-07				2020-04-21 00:00:00.0
416	479	54	1	2020-04-01	8.75759	2020-04-07 00:00:00.0	7.07861	2020-04-10 00:00:00.0	5.5401	2020-04-14 00:00:00.0	479-02	22	0	Household	1. Always	2020-04-04	0	2020-03-30 00:00:00.0		2020-04-07				2020-04-21 00:00:00.0
417	486	34	0	2020-04-03	6.89707	2020-04-07 00:00:00.0	6.51394	2020-04-10 00:00:00.0			486-01	34	0	HCW	1. Always	2020-04-03	0			2020-04-07				2020-04-21 00:00:00.0
418	488	52	1	2020-04-03	5.692	2020-04-08 00:00:00.0	8.72333	2020-04-11 00:00:00.0		2020-04-15 00:00:00.0	488-01	26	0	Household	0. Never	2020-04-08	0	2020-04-10 00:00:00.0		2020-04-08		2020-04-13		2020-04-22 00:00:00.0
419	489	61	0	2020-04-03	8.00778	2020-04-08 00:00:00.0	5.5401	2020-04-11 00:00:00.0	7.97352	2020-04-15 00:00:00.0	489-01	60	1	Household	1. Always	2020-04-03	1	2020-04-09 00:00:00.0	6.2723	2020-04-08				2020-04-22 00:00:00.0
420	489	61	0	2020-04-03	8.00778	2020-04-08 00:00:00.0	5.5401	2020-04-11 00:00:00.0	7.97352	2020-04-15 00:00:00.0	489-02	30	1	Household	1. Always	2020-04-03	0			2020-04-08				2020-04-22 00:00:00.0
421	490	49	1	2020-04-07	8.1028	2020-04-08 00:00:00.0	6.2723	2020-04-11 00:00:00.0		2020-04-15 00:00:00.0	490-01	39	0	Household	0. Never	2020-04-03	0			2020-04-08				2020-04-22 00:00:00.0
422	490	49	1	2020-04-07	8.1028	2020-04-08 00:00:00.0	6.2723	2020-04-11 00:00:00.0		2020-04-15 00:00:00.0	490-02	21	1	Household	0. Never	2020-04-03	0			2020-04-08				2020-04-22 00:00:00.0
423	491	54	1	2020-04-03		2020-04-08 00:00:00.0		2020-04-11 00:00:00.0		2020-04-15 00:00:00.0	491-01	60	0	Household	1. Always	2020-04-08	0			2020-04-08				2020-04-22 00:00:00.0
424	497	27	1	2020-04-06	10.025	2020-04-08 00:00:00.0	7.99952	2020-04-11 00:00:00.0	7.46314	2020-04-15 00:00:00.0	497-01	59	0	Household	0. Never	2020-04-05	0			2020-04-08				2020-04-22 00:00:00.0
425	497	27	1	2020-04-06	10.025	2020-04-08 00:00:00.0	7.99952	2020-04-11 00:00:00.0	7.46314	2020-04-15 00:00:00.0	497-02	58	1	Household	0. Never	2020-04-05	1		4.8079	2020-04-08				2020-04-22 00:00:00.0
426	497	27	1	2020-04-06	10.025	2020-04-08 00:00:00.0	7.99952	2020-04-11 00:00:00.0	7.46314	2020-04-15 00:00:00.0	497-03	31	0	Household	0. Never	2020-04-06	0			2020-04-08				2020-04-22 00:00:00.0
427	498	24	1	2020-04-03	8.81507	2020-04-08 00:00:00.0	7.02935	2020-04-11 00:00:00.0	6.59688	2020-04-15 00:00:00.0	498-02	50	1	Household	1. Always	2020-04-04	0	2020-04-18 00:00:00.0		2020-04-08				2020-04-22 00:00:00.0
428	498	24	1	2020-04-03	8.81507	2020-04-08 00:00:00.0	7.02935	2020-04-11 00:00:00.0	6.59688	2020-04-15 00:00:00.0	498-03	18	1	Household	1. Always	2020-04-04	0	2020-04-05 00:00:00.0		2020-04-08				2020-04-22 00:00:00.0
429	498	24	1	2020-04-03	8.81507	2020-04-08 00:00:00.0	7.02935	2020-04-11 00:00:00.0	6.59688	2020-04-15 00:00:00.0	498-04	51	0	Household	1. Always	2020-04-04	0			2020-04-08				2020-04-22 00:00:00.0
430	498	24	1	2020-04-03	8.81507	2020-04-08 00:00:00.0	7.02935	2020-04-11 00:00:00.0	6.59688	2020-04-15 00:00:00.0	498-05	43	0	HCW	1. Always	2020-04-02	1			2020-04-08			8.4689	2020-04-22 00:00:00.0
431	500	50	1	2020-04-03	8.835	2020-04-08 00:00:00.0		2020-04-11 00:00:00.0		2020-04-15 00:00:00.0	500-01	21	1	Household	0. Never	2020-04-03	0	2020-04-09 00:00:00.0		2020-04-08		2020-04-15		2020-04-22 00:00:00.0
432	506	38	1	2020-04-04	6.35478	2020-04-08 00:00:00.0		2020-04-11 00:00:00.0	4.2176	2020-04-15 00:00:00.0	506-01	41	0	Household	1. Always	2020-04-02	0			2020-04-08				2020-04-22 00:00:00.0
433	509	37	1	2020-04-03	6.73901	2020-04-08 00:00:00.0	5.38273	2020-04-11 00:00:00.0	5.24678	2020-04-15 00:00:00.0	509-01	38	0	Household	0. Never	2020-04-08	0			2020-04-08				2020-04-22 00:00:00.0
434	510	33	1	2020-04-04	6.97079	2020-04-08 00:00:00.0	6.84781	2020-04-11 00:00:00.0		2020-04-15 00:00:00.0	510-01	34	0	Household	1. Always	2020-04-04	0			2020-04-08				2020-04-22 00:00:00.0
435	510	33	1	2020-04-04	6.97079	2020-04-08 00:00:00.0	6.84781	2020-04-11 00:00:00.0		2020-04-15 00:00:00.0	510-02	42	1	HCW	999. Unknown	2020-04-07	0			2020-04-08				2020-04-23 00:00:00.0
436	510	33	1	2020-04-04	6.97079	2020-04-08 00:00:00.0	6.84781	2020-04-11 00:00:00.0		2020-04-15 00:00:00.0	510-03	41	1	HCW	1. Always	2020-04-07	0			2020-04-08				2020-04-23 00:00:00.0
437	510	33	1	2020-04-04	6.97079	2020-04-08 00:00:00.0	6.84781	2020-04-11 00:00:00.0		2020-04-15 00:00:00.0	510-04	40	0	HCW	999. Unknown	2020-04-07	0			2020-04-08				2020-04-23 00:00:00.0
438	514	42	1	2020-04-04		2020-04-08 00:00:00.0		2020-04-11 00:00:00.0		2020-04-15 00:00:00.0	514-01	43	0	Household	1. Always	2020-03-14	0			2020-04-08				2020-04-22 00:00:00.0
439	522	47	1	2020-04-05	6.23084	2020-04-09 00:00:00.0	6.02073	2020-04-12 00:00:00.0		2020-04-16 00:00:00.0	522-01	50	0	Household	1. Always	2020-04-02	1	2020-04-10 00:00:00.0	11.3977	2020-04-09				2020-04-23 00:00:00.0
440	523	27	1	2020-04-07	9.88727	2020-04-09 00:00:00.0	8.45762	2020-04-12 00:00:00.0	6.2723	2020-04-16 00:00:00.0	523-01	26	1	Household	1. Always	2020-04-07	1	2020-04-14 00:00:00.0		2020-04-09	8.1028	2020-04-15	4.0757	2020-04-23 00:00:00.0
441	526	46	1	2020-04-06	9.5672	2020-04-09 00:00:00.0					526-01	38	1	HCW	1. Always	2020-04-06	0	2020-04-11 00:00:00.0		2020-04-09				2020-04-23 00:00:00.0
442	526	46	1	2020-04-06	9.5672	2020-04-09 00:00:00.0					526-02	60	1	HCW	1. Always	2020-04-06	0	2020-04-11 00:00:00.0		2020-04-09		2020-04-14		2020-04-23 00:00:00.0
443	526	46	1	2020-04-06	9.5672	2020-04-09 00:00:00.0					526-03	19	0	Household	0. Never	2020-04-07	0			2020-04-09
444	528	28	1	2020-04-05	8.48921	2020-04-09 00:00:00.0	7.77981	2020-04-12 00:00:00.0	6.51705	2020-04-16 00:00:00.0	528-01	30	1	Household	0. Never	2020-04-05	0			2020-04-09				2020-04-23 00:00:00.0
445	534	21	1	2020-04-02	6.3969	2020-04-09 00:00:00.0		2020-04-13 00:00:00.0		2020-04-16 00:00:00.0	534-01	57	1	Household	1. Always	2020-04-05	1	2020-04-02 00:00:00.0	5.174	2020-04-09				2020-04-23 00:00:00.0
446	534	21	1	2020-04-02	6.3969	2020-04-09 00:00:00.0		2020-04-13 00:00:00.0		2020-04-16 00:00:00.0	534-02	28	1	Household	1. Always	2020-04-07	1	2020-04-21 00:00:00.0	5.5401	2020-04-09				2020-04-23 00:00:00.0
447	534	21	1	2020-04-02	6.3969	2020-04-09 00:00:00.0		2020-04-13 00:00:00.0		2020-04-16 00:00:00.0	534-03	30	1	Household	1. Always	2020-04-06	1	2020-04-02 00:00:00.0	5.174	2020-04-09				2020-04-23 00:00:00.0
448	536	54	1	2020-04-04	6.67932	2020-04-09 00:00:00.0	8.04752	2020-04-12 00:00:00.0	5.19666	2020-04-16 00:00:00.0	536-01	25	1	Household	1. Always	2020-04-04	0			2020-04-09				2020-04-23 00:00:00.0
449	539	58	1	2020-04-02	6.52142	2020-04-08 00:00:00.0		2020-04-11 00:00:00.0	5.73771	2020-04-15 00:00:00.0	539-01	24	1	Household	1. Always	2020-04-03	0			2020-04-08				2020-04-22 00:00:00.0
450	541	47	0	2020-04-07	9.13037	2020-04-09 00:00:00.0	6.86133	2020-04-12 00:00:00.0	5.36677	2020-04-16 00:00:00.0	541-01	37	1	Household	1. Always	2020-04-07	0	2020-04-12 00:00:00.0		2020-04-09				2020-04-23 00:00:00.0
451	542	26	0	2020-04-07	8.4689	2020-04-09 00:00:00.0	6.6384	2020-04-12 00:00:00.0	4.4418	2020-04-16 00:00:00.0	542-01	26	0	Household	1. Always	2020-04-07	0			2020-04-09				2020-04-23 00:00:00.0
452	543	24	1	2020-04-05	5.48016	2020-04-09 00:00:00.0	10.5338	2020-04-12 00:00:00.0	5.07717	2020-04-16 00:00:00.0	543-01	58	0	Household	0. Never	2020-04-05	0			2020-04-09				2020-04-23 00:00:00.0
453	543	24	1	2020-04-05	5.48016	2020-04-09 00:00:00.0	10.5338	2020-04-12 00:00:00.0	5.07717	2020-04-16 00:00:00.0	543-02	56	1	Household	0. Never	2020-04-05	0			2020-04-09				2020-04-23 00:00:00.0
454	543	24	1	2020-04-05	5.48016	2020-04-09 00:00:00.0	10.5338	2020-04-12 00:00:00.0	5.07717	2020-04-16 00:00:00.0	543-03	21	1	Household	0. Never	2020-04-05	0			2020-04-09				2020-04-23 00:00:00.0
455	543	24	1	2020-04-05	5.48016	2020-04-09 00:00:00.0	10.5338	2020-04-12 00:00:00.0	5.07717	2020-04-16 00:00:00.0	543-04	21	1	Household	0. Never	2020-04-05	0			2020-04-09				2020-04-23 00:00:00.0
456	543	24	1	2020-04-05	5.48016	2020-04-09 00:00:00.0	10.5338	2020-04-12 00:00:00.0	5.07717	2020-04-16 00:00:00.0	543-05	27	1	HCW	1. Always	2020-04-07	0			2020-04-09				2020-04-24 00:00:00.0
457	543	24	1	2020-04-05	5.48016	2020-04-09 00:00:00.0	10.5338	2020-04-12 00:00:00.0	5.07717	2020-04-16 00:00:00.0	543-06	56	1	HCW	1. Always	2020-04-06	0			2020-04-09				2020-04-24 00:00:00.0
458	545	42	1	2020-04-06	9.8685	2020-04-09 00:00:00.0	8.77066	2020-04-12 00:00:00.0	6.15684	2020-04-16 00:00:00.0	545-01	29	1	HCW	1. Always	2020-04-09	0			2020-04-09
459	545	42	1	2020-04-06	9.8685	2020-04-09 00:00:00.0	8.77066	2020-04-12 00:00:00.0	6.15684	2020-04-16 00:00:00.0	545-02	44	1	HCW	1. Always	2020-04-07	0			2020-04-09				2020-04-23 00:00:00.0
460	546	52	1	2020-04-05	6.69007	2020-04-09 00:00:00.0	5.26056	2020-04-12 00:00:00.0		2020-04-16 00:00:00.0	546-01	61	1	HCW	1. Always	2020-04-06	0			2020-04-09				2020-04-23 00:00:00.0
461	546	52	1	2020-04-05	6.69007	2020-04-09 00:00:00.0	5.26056	2020-04-12 00:00:00.0		2020-04-16 00:00:00.0	546-02	49	1	HCW	1. Always	2020-04-06	0			2020-04-09				2020-04-23 00:00:00.0
462	551	37	1	2020-04-04	10.1438	2020-04-09 00:00:00.0	7.74561	2020-04-12 00:00:00.0	5.6092	2020-04-16 00:00:00.0	551-01	37	0	Household	0. Never	2020-04-04	0			2020-04-09				2020-04-23 00:00:00.0
463	552	55	1	2020-04-04	6.42406	2020-04-09 00:00:00.0	6.11054	2020-04-12 00:00:00.0		2020-04-16 00:00:00.0	552-01	55	0	Household	1. Always	2020-04-05	0			2020-04-09				2020-04-23 00:00:00.0
464	552	55	1	2020-04-04	6.42406	2020-04-09 00:00:00.0	6.11054	2020-04-12 00:00:00.0		2020-04-16 00:00:00.0	552-02	21	0	Household	0. Never	2020-04-05	0	2020-04-10 00:00:00.0		2020-04-09				2020-04-23 00:00:00.0
465	552	55	1	2020-04-04	6.42406	2020-04-09 00:00:00.0	6.11054	2020-04-12 00:00:00.0		2020-04-16 00:00:00.0	552-03	23	1	Household	0. Never	2020-04-05	1	2020-04-10 00:00:00.0	7.0045	2020-04-09				2020-04-23 00:00:00.0
466	555	40	1	2020-04-04		2020-04-09 00:00:00.0	4.8079	2020-04-12 00:00:00.0	4.0757	2020-04-16 00:00:00.0	555-01	62	1	HCW	1. Always	2020-04-04	1		7.0045	2020-04-09				2020-04-23 00:00:00.0
467	555	40	1	2020-04-04		2020-04-09 00:00:00.0	4.8079	2020-04-12 00:00:00.0	4.0757	2020-04-16 00:00:00.0	555-02	47	0	HCW	1. Always	2020-04-04	0	2020-04-11 00:00:00.0		2020-04-09		2020-04-12		2020-04-23 00:00:00.0
468	555	40	1	2020-04-04		2020-04-09 00:00:00.0	4.8079	2020-04-12 00:00:00.0	4.0757	2020-04-16 00:00:00.0	555-03	22	1	HCW	1. Always	2020-04-04	0	2020-04-19 00:00:00.0		2020-04-09				2020-04-23 00:00:00.0
469	555	40	1	2020-04-04		2020-04-09 00:00:00.0	4.8079	2020-04-12 00:00:00.0	4.0757	2020-04-16 00:00:00.0	555-04	55	1	HCW	1. Always	2020-04-04	0			2020-04-09				2020-04-24 00:00:00.0
470	555	40	1	2020-04-04		2020-04-09 00:00:00.0	4.8079	2020-04-12 00:00:00.0	4.0757	2020-04-16 00:00:00.0	555-05	21	1	HCW	1. Always	2020-04-04	0	2020-04-21 00:00:00.0		2020-04-09				2020-04-23 00:00:00.0
471	555	40	1	2020-04-04		2020-04-09 00:00:00.0	4.8079	2020-04-12 00:00:00.0	4.0757	2020-04-16 00:00:00.0	555-06	38	1	HCW	1. Always	2020-04-04	0	2020-04-22 00:00:00.0		2020-04-09				2020-04-22 00:00:00.0
472	555	40	1	2020-04-04		2020-04-09 00:00:00.0	4.8079	2020-04-12 00:00:00.0	4.0757	2020-04-16 00:00:00.0	555-07	62	1	HCW	1. Always	2020-04-04	0			2020-04-09				2020-04-23 00:00:00.0
473	555	40	1	2020-04-04		2020-04-09 00:00:00.0	4.8079	2020-04-12 00:00:00.0	4.0757	2020-04-16 00:00:00.0	555-08	48	1	HCW	1. Always	2020-04-04	0			2020-04-09				2020-04-23 00:00:00.0
474	555	40	1	2020-04-04		2020-04-09 00:00:00.0	4.8079	2020-04-12 00:00:00.0	4.0757	2020-04-16 00:00:00.0	555-09	53	1	HCW	1. Always	2020-04-04	1			2020-04-09				2020-04-23 00:00:00.0
475	555	40	1	2020-04-04		2020-04-09 00:00:00.0	4.8079	2020-04-12 00:00:00.0	4.0757	2020-04-16 00:00:00.0	555-10	21	1	HCW	1. Always	2020-04-04	0			2020-04-09				2020-04-23 00:00:00.0
476	560	51	0	2020-04-05	9.31332	2020-04-10 00:00:00.0	7.28481	2020-04-13 00:00:00.0	6.7966	2020-04-17 00:00:00.0	560-01	46	1	HCW	1. Always	2020-04-06	0			2020-04-10				2020-04-24 00:00:00.0
477	560	51	0	2020-04-05	9.31332	2020-04-10 00:00:00.0	7.28481	2020-04-13 00:00:00.0	6.7966	2020-04-17 00:00:00.0	560-02	45	1	HCW	1. Always	2020-04-06	0			2020-04-10				2020-04-24 00:00:00.0
478	561	37	1	2020-04-06	10.0846	2020-04-10 00:00:00.0	6.88969	2020-04-13 00:00:00.0		2020-04-17 00:00:00.0	561-01	38	0	Household	1. Always	2020-04-06	0			2020-04-10				2020-04-24 00:00:00.0
479	562	39	1	2020-04-06		2020-04-10 00:00:00.0		2020-04-13 00:00:00.0		2020-04-17 00:00:00.0	562-01	28	0	Household	1. Always	2020-04-07	0			2020-04-10				2020-04-24 00:00:00.0
480	562	39	1	2020-04-06		2020-04-10 00:00:00.0		2020-04-13 00:00:00.0		2020-04-17 00:00:00.0	562-02	63	1	Household	1. Always	2020-04-06	0			2020-04-10				2020-04-24 00:00:00.0
481	563	50	1	2020-04-08	9.44787	2020-04-10 00:00:00.0			6.29469	2020-04-17 00:00:00.0	563-01	50	0	Household	0. Never	2020-04-08	0	2020-04-14 00:00:00.0		2020-04-10				2020-04-24 00:00:00.0
482	563	50	1	2020-04-08	9.44787	2020-04-10 00:00:00.0			6.29469	2020-04-17 00:00:00.0	563-02	18	0	Household	0. Never	2020-04-08	0			2020-04-10				2020-04-24 00:00:00.0
483	570	40	1	2020-04-04	5.74281	2020-04-10 00:00:00.0	4.65061	2020-04-13 00:00:00.0	4.15251	2020-04-17 00:00:00.0	570-01	38	0	Household	0. Never	2020-04-04	0			2020-04-10				2020-04-24 00:00:00.0
484	577	22	1	2020-04-04	8.39964	2020-04-10 00:00:00.0	5.93352	2020-04-13 00:00:00.0			577-01	54	1	Household	0. Never	2020-04-08	0			2020-04-10
485	584	54	0	2020-04-10	5.67063	2020-04-11 00:00:00.0	5.63029	2020-04-14 00:00:00.0	4.91521	2020-04-18 00:00:00.0	584-01	55	1	Household	999. Unknown	2020-04-06	0			2020-04-11				2020-04-25 00:00:00.0
486	584	54	0	2020-04-10	5.67063	2020-04-11 00:00:00.0	5.63029	2020-04-14 00:00:00.0	4.91521	2020-04-18 00:00:00.0	584-02	29	0	Household	999. Unknown	2020-04-06	1	2020-04-13 00:00:00.0	5.9062	2020-04-11	11.3977	2020-04-14		2020-04-25 00:00:00.0
487	584	54	0	2020-04-10	5.67063	2020-04-11 00:00:00.0	5.63029	2020-04-14 00:00:00.0	4.91521	2020-04-18 00:00:00.0	584-03	24	1	Household	999. Unknown	2020-04-06	0	2020-04-12 00:00:00.0		2020-04-11		2020-04-14		2020-04-25 00:00:00.0
488	584	54	0	2020-04-10	5.67063	2020-04-11 00:00:00.0	5.63029	2020-04-14 00:00:00.0	4.91521	2020-04-18 00:00:00.0	584-05	26	0	HCW	1. Always	2020-04-06	0			2020-04-11				2020-04-25 00:00:00.0
489	587	24	1	2020-04-08	8.22469	2020-04-11 00:00:00.0	6.11984	2020-04-14 00:00:00.0	4.85694	2020-04-18 00:00:00.0	587-01	55	0	Household	999. Unknown	2020-04-08	0	2020-04-12 00:00:00.0		2020-04-11		2020-04-18		2020-04-25 00:00:00.0
490	590	40	1	2020-04-08	9.77702	2020-04-11 00:00:00.0	7.21712	2020-04-14 00:00:00.0		2020-04-18 00:00:00.0	590-01	60	1	HCW	1. Always	2020-04-08	1	2020-04-10 00:00:00.0	9.2011	2020-04-11		2020-04-17	4.0757	2020-04-25 00:00:00.0
491	590	40	1	2020-04-08	9.77702	2020-04-11 00:00:00.0	7.21712	2020-04-14 00:00:00.0		2020-04-18 00:00:00.0	590-02	54	1	HCW	1. Always	2020-04-08	1	2020-04-13 00:00:00.0		2020-04-11			8.835	2020-04-25 00:00:00.0
492	596	26	0	2020-04-05	7.3942	2020-04-11 00:00:00.0	5.94291	2020-04-14 00:00:00.0	4.95738	2020-04-18 00:00:00.0	596-01	33	1	HCW	1. Always	2020-04-07	0	2020-04-12 00:00:00.0		2020-04-12				2020-04-26 00:00:00.0
493	597	36	0	2020-04-07	8.835	2020-04-11 00:00:00.0					597-01	38	0	Household	0. Never	2020-04-09	1	2020-04-12 00:00:00.0	7.3706	2020-04-11				2020-04-25 00:00:00.0
494	601	39	0	2020-04-06	5.70373	2020-04-11 00:00:00.0		2020-04-14 00:00:00.0	4.00277	2020-04-18 00:00:00.0	601-01	25	0	HCW	1. Always	2020-04-07	0			2020-04-11
495	602	35	1	2020-04-07	6.28771	2020-04-11 00:00:00.0	6.58944	2020-04-14 00:00:00.0	4.0757	2020-04-18 00:00:00.0	602-01	35	0	Household	999. Unknown	2020-04-07	0	2020-04-12 00:00:00.0		2020-04-11				2020-04-25 00:00:00.0
496	609	47	1	2020-04-06	10.2228	2020-04-12 00:00:00.0	9.2571	2020-04-15 00:00:00.0	5.43872	2020-04-19 00:00:00.0	609-01	40	0	Household	1. Always	2020-04-06	0			2020-04-12				2020-04-26 00:00:00.0
497	609	47	1	2020-04-06	10.2228	2020-04-12 00:00:00.0	9.2571	2020-04-15 00:00:00.0	5.43872	2020-04-19 00:00:00.0	609-02	49	1	HCW	1. Always	2020-04-07	0	2020-03-30 00:00:00.0		2020-04-12				2020-04-28 00:00:00.0
498	612	36	1	2020-04-07	7.53342	2020-04-12 00:00:00.0	6.55819	2020-04-15 00:00:00.0	5.55424	2020-04-19 00:00:00.0	612-01	36	0	Household	1. Always	2020-04-07	1	2020-04-13 00:00:00.0		2020-04-12			8.4689	2020-04-26 00:00:00.0
499	613	27	1	2020-04-09	8.89251	2020-04-12 00:00:00.0	7.8979	2020-04-15 00:00:00.0	4.6047	2020-04-19 00:00:00.0	613-01	29	0	Household	1. Always	2020-04-08	0			2020-04-12				2020-04-26 00:00:00.0
500	616	54	0			2020-04-13 00:00:00.0		2020-04-16 00:00:00.0		2020-04-20 00:00:00.0	616-01	50	1	Household	0. Never	2020-04-11	0	2020-03-28 00:00:00.0		2020-04-13				2020-04-27 00:00:00.0
501	617	31	1	2020-04-10	7.15395	2020-04-12 00:00:00.0	4.92136	2020-04-15 00:00:00.0		2020-04-19 00:00:00.0	617-01	50	1	HCW	0. Never	2020-04-11	0			2020-04-12				2020-04-26 00:00:00.0
502	617	31	1	2020-04-10	7.15395	2020-04-12 00:00:00.0	4.92136	2020-04-15 00:00:00.0		2020-04-19 00:00:00.0	617-03	74	0	Household	0. Never	2020-04-09	0			2020-04-12				2020-04-26 00:00:00.0
503	623	26	1	2020-04-06	8.44786	2020-04-12 00:00:00.0	6.6269	2020-04-15 00:00:00.0		2020-04-19 00:00:00.0	623-01	54	1	Household	0. Never	2020-04-11	0	2020-04-15 00:00:00.0		2020-04-12				2020-04-26 00:00:00.0
504	623	26	1	2020-04-06	8.44786	2020-04-12 00:00:00.0	6.6269	2020-04-15 00:00:00.0		2020-04-19 00:00:00.0	623-02	56	0	Household	0. Never	2020-04-11	0			2020-04-12				2020-04-26 00:00:00.0
505	623	26	1	2020-04-06	8.44786	2020-04-12 00:00:00.0	6.6269	2020-04-15 00:00:00.0		2020-04-19 00:00:00.0	623-03	54	1	Household	0. Never	2020-04-07	0			2020-04-12				2020-04-26 00:00:00.0
506	623	26	1	2020-04-06	8.44786	2020-04-12 00:00:00.0	6.6269	2020-04-15 00:00:00.0		2020-04-19 00:00:00.0	623-04	22	1	Household	0. Never	2020-04-07	0			2020-04-12				2020-04-26 00:00:00.0
507	623	26	1	2020-04-06	8.44786	2020-04-12 00:00:00.0	6.6269	2020-04-15 00:00:00.0		2020-04-19 00:00:00.0	623-05	84	1	Household	0. Never	2020-04-09	0			2020-04-12
508	628	46	1		6.2359	2020-04-12 00:00:00.0		2020-04-16 00:00:00.0		2020-04-19 00:00:00.0	628-01	46	1	Household	1. Always	2020-04-08	0			2020-04-12				2020-04-28 00:00:00.0
509	628	46	1		6.2359	2020-04-12 00:00:00.0		2020-04-16 00:00:00.0		2020-04-19 00:00:00.0	628-02	36	0	Household	1. Always	2020-04-08	1			2020-04-12				2020-04-28 00:00:00.0
510	630	35	1	2020-04-06	4.2551	2020-04-12 00:00:00.0	5.57272	2020-04-15 00:00:00.0		2020-04-19 00:00:00.0	630-01	26	0	HCW	0. Never	2020-04-06	0			2020-04-13				2020-04-27 00:00:00.0
511	631	38	1	2020-04-09	4.95028	2020-04-13 00:00:00.0	5.17251	2020-04-16 00:00:00.0	4.32864	2020-04-20 00:00:00.0	631-01	59	0	Household	1. Always	2020-04-08	1	2020-04-12 00:00:00.0	7.3706	2020-04-12			4.4418	2020-04-26 00:00:00.0
512	637	63	1	2020-04-10	7.72938	2020-04-13 00:00:00.0	5.93061	2020-04-16 00:00:00.0		2020-04-20 00:00:00.0	637-01	65	0	Household	0. Never	2020-04-08	1			2020-04-13				2020-04-27 00:00:00.0
513	637	63	1	2020-04-10	7.72938	2020-04-13 00:00:00.0	5.93061	2020-04-16 00:00:00.0		2020-04-20 00:00:00.0	637-02	25	1	Household	0. Never	2020-04-08	0			2020-04-13				2020-04-27 00:00:00.0
514	637	63	1	2020-04-10	7.72938	2020-04-13 00:00:00.0	5.93061	2020-04-16 00:00:00.0		2020-04-20 00:00:00.0	637-03	23	1	Household	0. Never	2020-04-08	0			2020-04-13				2020-04-27 00:00:00.0
515	645	35	0			2020-04-13 00:00:00.0		2020-04-16 00:00:00.0		2020-04-20 00:00:00.0	645-01	35	1	HCW	1. Always	2020-04-10	0			2020-04-13				2020-04-27 00:00:00.0
516	645	35	0			2020-04-13 00:00:00.0		2020-04-16 00:00:00.0		2020-04-20 00:00:00.0	645-02	54	1	HCW	1. Always	2020-04-09	0			2020-04-13				2020-04-27 00:00:00.0
517	645	35	0			2020-04-13 00:00:00.0		2020-04-16 00:00:00.0		2020-04-20 00:00:00.0	645-03	36	1	HCW	1. Always	2020-04-09	0			2020-04-13				2020-04-27 00:00:00.0
518	645	35	0			2020-04-13 00:00:00.0		2020-04-16 00:00:00.0		2020-04-20 00:00:00.0	645-04	47	1	HCW	1. Always	2020-04-09	0			2020-04-13				2020-04-27 00:00:00.0
519	645	35	0			2020-04-13 00:00:00.0		2020-04-16 00:00:00.0		2020-04-20 00:00:00.0	645-05	44	1	HCW	1. Always	2020-04-07	0	2020-03-13 00:00:00.0		2020-04-13				2020-04-27 00:00:00.0
520	645	35	0			2020-04-13 00:00:00.0		2020-04-16 00:00:00.0		2020-04-20 00:00:00.0	645-06	57	1	HCW	0. Never	2020-04-09	0			2020-04-13				2020-04-28 00:00:00.0
521	649	36	1	2020-04-11		2020-04-14 00:00:00.0		2020-04-17 00:00:00.0	5.5401	2020-04-21 00:00:00.0	649-01	53	0	HCW	1. Always	2020-04-09	0			2020-04-14				2020-04-28 00:00:00.0
522	650	55	1	2020-04-12	7.68061	2020-04-14 00:00:00.0	6.64472	2020-04-17 00:00:00.0	5.11093	2020-04-21 00:00:00.0	650-01	61	0	Household	1. Always	2020-04-11	0	2020-04-22 00:00:00.0		2020-04-14				2020-04-28 00:00:00.0
523	650	55	1	2020-04-12	7.68061	2020-04-14 00:00:00.0	6.64472	2020-04-17 00:00:00.0	5.11093	2020-04-21 00:00:00.0	650-02	26	0	Household	0. Never	2020-04-11	0			2020-04-14				2020-04-28 00:00:00.0
524	650	55	1	2020-04-12	7.68061	2020-04-14 00:00:00.0	6.64472	2020-04-17 00:00:00.0	5.11093	2020-04-21 00:00:00.0	650-03	18	0	Household	0. Never	2020-04-11	0			2020-04-14				2020-04-28 00:00:00.0
525	651	80	1	2020-04-10	4.46915	2020-04-14 00:00:00.0	5.90397	2020-04-17 00:00:00.0		2020-04-21 00:00:00.0	651-01	56	0	Household	1. Always	2020-04-10	0			2020-04-14				2020-04-28 00:00:00.0
526	651	80	1	2020-04-10	4.46915	2020-04-14 00:00:00.0	5.90397	2020-04-17 00:00:00.0		2020-04-21 00:00:00.0	651-02	18	1	Household	1. Always	2020-04-10	0			2020-04-14				2020-04-28 00:00:00.0
527	651	80	1	2020-04-10	4.46915	2020-04-14 00:00:00.0	5.90397	2020-04-17 00:00:00.0		2020-04-21 00:00:00.0	651-03	22	0	Household	0. Never	2020-04-10	0			2020-04-14				2020-04-28 00:00:00.0
528	662	40	1	2020-04-12	7.77853	2020-04-15 00:00:00.0	9.622	2020-04-18 00:00:00.0	6.29265	2020-04-22 00:00:00.0	662-01	42	0	Household	1. Always	2020-04-13	1	2020-04-25 00:00:00.0	8.835	2020-04-15				2020-04-29 00:00:00.0
529	668	19	1	2020-04-14	5.44325	2020-04-15 00:00:00.0		2020-04-18 00:00:00.0	4.43157	2020-04-22 00:00:00.0	668-01	56	0	Household	1. Always	2020-04-10	0			2020-04-15				2020-04-29 00:00:00.0
530	668	19	1	2020-04-14	5.44325	2020-04-15 00:00:00.0		2020-04-18 00:00:00.0	4.43157	2020-04-22 00:00:00.0	668-02	18	1	Household	1. Always	2020-04-10	0			2020-04-15				2020-04-29 00:00:00.0
531	668	19	1	2020-04-14	5.44325	2020-04-15 00:00:00.0		2020-04-18 00:00:00.0	4.43157	2020-04-22 00:00:00.0	668-03	22	0	Household	0. Never	2020-04-12	0			2020-04-15				2020-04-29 00:00:00.0
532	668	19	1	2020-04-14	5.44325	2020-04-15 00:00:00.0		2020-04-18 00:00:00.0	4.43157	2020-04-22 00:00:00.0	668-04	20	1	Household	0. Never	2020-04-12	0			2020-04-15				2020-04-29 00:00:00.0
533	669	50	1	2020-04-09	5.32683	2020-04-15 00:00:00.0	5.174	2020-04-18 00:00:00.0	4.21179	2020-04-22 00:00:00.0	669-01	38	1	HCW	1. Always	2020-04-10	0			2020-04-15				2020-04-29 00:00:00.0
534	669	50	1	2020-04-09	5.32683	2020-04-15 00:00:00.0	5.174	2020-04-18 00:00:00.0	4.21179	2020-04-22 00:00:00.0	669-02	45	1	HCW	1. Always	2020-04-10	0			2020-04-15				2020-04-29 00:00:00.0
535	669	50	1	2020-04-09	5.32683	2020-04-15 00:00:00.0	5.174	2020-04-18 00:00:00.0	4.21179	2020-04-22 00:00:00.0	669-03	26	1	Household	1. Always	2020-04-11	1		7.7367	2020-04-15				2020-04-29 00:00:00.0
536	669	50	1	2020-04-09	5.32683	2020-04-15 00:00:00.0	5.174	2020-04-18 00:00:00.0	4.21179	2020-04-22 00:00:00.0	669-04	46	1	HCW	0. Never	2020-04-10	0			2020-04-15				2020-04-29 00:00:00.0
537	674	26	1	2020-04-10	11.3977	2020-04-15 00:00:00.0		2020-04-18 00:00:00.0	4.0757	2020-04-22 00:00:00.0	674-01	27	0	Household	999. Unknown	2020-04-10	1	2020-04-18 00:00:00.0		2020-04-15	7.0045	2020-04-24		2020-04-29 00:00:00.0
538	676	43	1	2020-04-10	6.0631	2020-04-15 00:00:00.0		2020-04-18 00:00:00.0	4.84406	2020-04-22 00:00:00.0	676-01	56	1	NH	1. Always	2020-04-10	0			2020-04-16				2020-04-30 00:00:00.0
539	676	43	1	2020-04-10	6.0631	2020-04-15 00:00:00.0		2020-04-18 00:00:00.0	4.84406	2020-04-22 00:00:00.0	676-02	66	1	NH	1. Always	2020-04-14	1	2020-04-17 00:00:00.0	5.174	2020-04-16				2020-04-30 00:00:00.0
540	676	43	1	2020-04-10	6.0631	2020-04-15 00:00:00.0		2020-04-18 00:00:00.0	4.84406	2020-04-22 00:00:00.0	676-03	20	1	NH	1. Always	2020-04-14	0	2020-04-16 00:00:00.0		2020-04-16				2020-04-30 00:00:00.0
541	676	43	1	2020-04-10	6.0631	2020-04-15 00:00:00.0		2020-04-18 00:00:00.0	4.84406	2020-04-22 00:00:00.0	676-05	26	0	NH	1. Always	2020-04-14	0			2020-04-16				2020-04-30 00:00:00.0
542	676	43	1	2020-04-10	6.0631	2020-04-15 00:00:00.0		2020-04-18 00:00:00.0	4.84406	2020-04-22 00:00:00.0	676-06	30	1	NH	1. Always	2020-04-14	1		5.9062	2020-04-16				2020-04-30 00:00:00.0
543	676	43	1	2020-04-10	6.0631	2020-04-15 00:00:00.0		2020-04-18 00:00:00.0	4.84406	2020-04-22 00:00:00.0	676-07	25	1	NH	1. Always	2020-04-14	0			2020-04-16				2020-04-30 00:00:00.0
544	676	43	1	2020-04-10	6.0631	2020-04-15 00:00:00.0		2020-04-18 00:00:00.0	4.84406	2020-04-22 00:00:00.0	676-08	18	1	NH	1. Always	2020-04-14	0			2020-04-16				2020-04-30 00:00:00.0
545	686	25	0	2020-04-12	6.8651	2020-04-15 00:00:00.0	4.8079	2020-04-19 00:00:00.0	5.30423	2020-04-23 00:00:00.0	686-01	53	0	Household	1. Always	2020-04-12	0			2020-04-16				2020-04-30 00:00:00.0
546	686	25	0	2020-04-12	6.8651	2020-04-15 00:00:00.0	4.8079	2020-04-19 00:00:00.0	5.30423	2020-04-23 00:00:00.0	686-02	54	1	Household	1. Always	2020-04-12	0			2020-04-16				2020-04-30 00:00:00.0
547	686	25	0	2020-04-12	6.8651	2020-04-15 00:00:00.0	4.8079	2020-04-19 00:00:00.0	5.30423	2020-04-23 00:00:00.0	686-03	21	1	NH	1. Always	2020-04-12	0			2020-04-17				2020-05-01 00:00:00.0
548	693	26	0	2020-04-15	7.9104	2020-04-16 00:00:00.0	6.51722	2020-04-19 00:00:00.0		2020-04-23 00:00:00.0	693-01	52	1	Household	1. Always	2020-04-13	0			2020-04-16				2020-04-30 00:00:00.0
549	697	30	1	2020-04-11	10.2575	2020-04-17 00:00:00.0	6.2008	2020-04-20 00:00:00.0		2020-04-24 00:00:00.0	697-01	36	0	Household	1. Always	2020-04-13	1	2020-04-19 00:00:00.0	7.3706	2020-04-17	9.5672	2020-04-20		2020-05-01 00:00:00.0
550	703	42	1	2020-04-15	7.47487	2020-04-18 00:00:00.0	6.65756	2020-04-21 00:00:00.0	4.8614	2020-04-25 00:00:00.0	703-01	41	0	Household	0. Never	2020-04-14	0			2020-04-18
551	704	51	1		4.8079	2020-04-18 00:00:00.0		2020-04-21 00:00:00.0		2020-04-25 00:00:00.0	704-01	60	0	Household	1. Always	2020-04-16	1			2020-04-18				2020-05-02 00:00:00.0
552	707	71	1								707-01	44	1	Household	1. Always	2020-04-14	0	2020-04-19 00:00:00.0		2020-04-18		2020-04-21		2020-05-02 00:00:00.0
553	716	45	1		5.9062	2020-04-19 00:00:00.0	7.3706	2020-04-22 00:00:00.0		2020-04-26 00:00:00.0	716-02	41	1	Household	0. Never	2020-04-15	1		7.3706	2020-04-19				2020-05-03 00:00:00.0
554	717	23	0	2020-04-14	4.15611	2020-04-19 00:00:00.0	4.21302	2020-04-22 00:00:00.0		2020-04-26 00:00:00.0	717-01	49	1	Household	0. Never	2020-04-14	0	2020-04-19 00:00:00.0		2020-04-19				2020-05-03 00:00:00.0
555	717	23	0	2020-04-14	4.15611	2020-04-19 00:00:00.0	4.21302	2020-04-22 00:00:00.0		2020-04-26 00:00:00.0	717-02	57	0	Household	999. Unknown	2020-04-14	0			2020-04-19				2020-05-03 00:00:00.0
556	718	45	1	2020-04-14	6.4358	2020-04-19 00:00:00.0	4.11338	2020-04-22 00:00:00.0		2020-04-26 00:00:00.0	718-01	43	0	Household	1. Always	2020-04-14	1	2020-04-19 00:00:00.0	5.5401	2020-04-19				2020-05-03 00:00:00.0
557	721	49	1	2020-04-14	4.2548	2020-04-19 00:00:00.0		2020-04-22 00:00:00.0		2020-04-26 00:00:00.0	721-01	61	1	Household	1. Always	2020-04-16	0			2020-04-19				2020-05-03 00:00:00.0
558	721	49	1	2020-04-14	4.2548	2020-04-19 00:00:00.0		2020-04-22 00:00:00.0		2020-04-26 00:00:00.0	721-02	19	1	Household	1. Always	2020-04-16	0			2020-04-19				2020-05-03 00:00:00.0
559	728	56	1	2020-04-18	7.3706	2020-04-20 00:00:00.0		2020-04-23 00:00:00.0		2020-04-27 00:00:00.0	728-01	57	0	Household	1. Always	2020-04-15	0			2020-04-20				2020-05-04 00:00:00.0
560	731	25	1	2020-04-15	7.91311	2020-04-20 00:00:00.0	5.917	2020-04-23 00:00:00.0		2020-04-27 00:00:00.0	731-01	20	1	HCW	0. Never	2020-04-16	0			2020-04-20				2020-05-04 00:00:00.0
561	740	44	1	2020-04-18	9.00803	2020-04-21 00:00:00.0	7.99081	2020-04-24 00:00:00.0		2020-04-28 00:00:00.0	740-01	67	1	Household	1. Always	2020-04-15	0			2020-04-21				2020-05-05 00:00:00.0
562	742	26	1	2020-04-18	6.4998	2020-04-21 00:00:00.0	6.86829	2020-04-24 00:00:00.0		2020-04-28 00:00:00.0	742-01	32	0	Household	0. Never	2020-04-17	0			2020-04-21				2020-05-06 00:00:00.0
563	742	26	1	2020-04-18	6.4998	2020-04-21 00:00:00.0	6.86829	2020-04-24 00:00:00.0		2020-04-28 00:00:00.0	742-02	53	1	HCW	1. Always	2020-04-17	0	2020-04-23 00:00:00.0		2020-04-21				2020-05-05 00:00:00.0
564	743	48	1	2020-04-17	5.50693	2020-04-21 00:00:00.0	5.13886	2020-04-24 00:00:00.0		2020-04-28 00:00:00.0	743-01	25	1	HCW	1. Always	2020-04-15	0			2020-04-21				2020-05-05 00:00:00.0
565	744	57	1	2020-04-16	6.25801	2020-04-21 00:00:00.0	7.59458	2020-04-24 00:00:00.0		2020-04-28 00:00:00.0	744-01	21	1	Household	0. Never	2020-04-18	0			2020-04-21				2020-05-05 00:00:00.0
566	746	32	1	2020-04-17	6.2723	2020-04-22 00:00:00.0		2020-04-25 00:00:00.0		2020-04-29 00:00:00.0	746-01	39	0	Household	0. Never	2020-04-17	0	2020-04-23 00:00:00.0		2020-04-22		2020-04-27		2020-05-06 00:00:00.0
567	758	28	1	2020-04-20	7.3706	2020-04-24 00:00:00.0		2020-04-27 00:00:00.0		2020-05-01 00:00:00.0	758-01	36	0	Household	0. Never	2020-04-19	0			2020-04-24				2020-05-08 00:00:00.0
568	763	28	1	2020-04-20	4.0757	2020-04-26 00:00:00.0		2020-04-29 00:00:00.0		2020-05-03 00:00:00.0	763-01	59	0	Household	1. Always	2020-04-20	0			2020-04-26				2020-05-10 00:00:00.0
569	766	25	1	2020-04-25	7.0045	2020-04-29 00:00:00.0		2020-05-02 00:00:00.0		2020-05-06 00:00:00.0	766-02	82	0	Household	1. Always	2020-04-24	0			2020-04-29				2020-05-13 00:00:00.0
570	766	25	1	2020-04-25	7.0045	2020-04-29 00:00:00.0		2020-05-02 00:00:00.0		2020-05-06 00:00:00.0	766-03	26	1	Household	1. Always	2020-04-24	0			2020-04-29				2020-05-13 00:00:00.0
571	11	39	1	2020-03-14	8.53992	2020-03-19 00:00:00.0	7.34619	2020-03-22 00:00:00.0		2020-03-26 00:00:00.0	011-01	55	0	Household	999. Unknown	2020-03-14	0	2020-03-23 00:00:00.0
572	12	62	1	2020-03-14	7.9895	2020-03-19 00:00:00.0	5.49905	2020-03-22 00:00:00.0		2020-03-26 00:00:00.0	012-04	61	0	HCW	1. Always	2020-03-16	0
573	17	45	1	2020-03-14	6.89625	2020-03-20 00:00:00.0	8.15327	2020-03-23 00:00:00.0		2020-03-27 00:00:00.0	017-01	54	0	Household	999. Unknown	2020-03-14	0
574	29	51	0	2020-03-16	8.70254	2020-03-21 00:00:00.0		2020-03-24 00:00:00.0		2020-03-29 00:00:00.0	029-01	34	1	Unknown			0
575	32	55	1	2020-03-20	8.37412	2020-03-21 00:00:00.0	5.30634	2020-03-24 00:00:00.0		2020-03-28 00:00:00.0	032-01		0	Unknown	999. Unknown	2020-03-17	0
576	36	25	1	2020-03-17	11.1718	2020-03-21 00:00:00.0	9.50087	2020-03-24 00:00:00.0		2020-03-28 00:00:00.0	036-01		1			2020-03-17	0
577	38	40	1	2020-03-19	9.33987	2020-03-21 00:00:00.0	9.08635	2020-03-24 00:00:00.0		2020-03-28 00:00:00.0	038-01		1	HCW	999. Unknown	2020-03-18	0
578	39	44	1	2020-03-18	9.60193	2020-03-21 00:00:00.0	8.18865	2020-03-24 00:00:00.0		2020-03-28 00:00:00.0	039-01	46	0	Household	999. Unknown	2020-03-18	0
579	56	55	1	2020-03-19	9.79415	2020-03-23 00:00:00.0	5.90873	2020-03-26 00:00:00.0		2020-03-30 00:00:00.0	056-01	52	0	Household			0
580	67	34	1	2020-03-21	9.97565	2020-03-24 00:00:00.0	7.74267	2020-03-27 00:00:00.0		2020-03-31 00:00:00.0	067-01	34	0	Household		2020-03-20	0
581	80	31	1	2020-03-24	5.76818	2020-03-25 00:00:00.0	4.03208	2020-03-28 00:00:00.0		2020-04-01 00:00:00.0	080-01	24	1	Household		2020-03-20	0
582	81	24	1	2020-03-21	8.48055	2020-03-25 00:00:00.0	7.88157	2020-03-28 00:00:00.0		2020-04-01 00:00:00.0	081-01	29	1	Household			0
583	89	33	1	2020-03-21	10.1186	2020-03-25 00:00:00.0	8.71517	2020-03-28 00:00:00.0		2020-04-01 00:00:00.0	089-01	39	1	Unknown			0
584	150	26	1	2020-03-24	7.7367	2020-03-27 00:00:00.0		2020-03-30 00:00:00.0		2020-04-03 00:00:00.0	150-01	38	0	Household			0
585	180	40	1	2020-03-25	11.3142	2020-03-28 00:00:00.0	8.9899	2020-03-31 00:00:00.0		2020-04-04 00:00:00.0	180-01	49	0	Household			0
586	229	29	0	2020-03-26	6.91188	2020-03-30 00:00:00.0	6.0214	2020-04-02 00:00:00.0		2020-04-06 00:00:00.0	229-01	27	0	Household	999. Unknown	2020-03-26	0
587	373	51	1	2020-03-30	9.03214	2020-04-04 00:00:00.0	8.88517	2020-04-07 00:00:00.0	5.15396	2020-04-11 00:00:00.0	373-01	55	0	Household	999. Unknown		0
588	451	30	0	2020-04-01	6.72555	2020-04-06 00:00:00.0		2020-04-09 00:00:00.0		2020-04-13 00:00:00.0	451-01	22	1	HCW	1. Always		0
589	472	57	1	2020-04-06	4.82592	2020-04-07 00:00:00.0		2020-04-10 00:00:00.0		2020-04-14 00:00:00.0	472-01	47	1	HCW	999. Unknown	2020-04-04	0
590	498	24	1	2020-04-03	8.81507	2020-04-08 00:00:00.0	7.02935	2020-04-11 00:00:00.0	6.59688	2020-04-15 00:00:00.0	498-01	28	0	Household	999. Unknown		0
591	716	45	1		5.9062	2020-04-19 00:00:00.0	7.3706	2020-04-22 00:00:00.0		2020-04-26 00:00:00.0	716-01	46	0	Household	999. Unknown		0
592	23	24	1	2020-03-16	8.22831	2020-03-20 00:00:00.0	7.52124	2020-03-23 00:00:00.0		2020-03-27 00:00:00.0	023-02	61	0	Household	999. Unknown	2020-03-16	0
593	24	39	1	2020-03-16	10.8559	2020-03-20 00:00:00.0	4.80488	2020-03-23 00:00:00.0		2020-03-27 00:00:00.0	024-02	39	0	Household	999. Unknown	2020-03-17	0
594	51	32	0	2020-03-18	8.8671	2020-03-22 00:00:00.0	7.123	2020-03-25 00:00:00.0		2020-03-29 00:00:00.0	051-02	34	1	HCW	999. Unknown	2020-03-18	0
595	60	50	1	2020-03-20	8.835	2020-03-23 00:00:00.0					060-02	60	1	Unknown			0
596	75	36	1		5.07717	2020-03-27 00:00:00.0		2020-03-30 00:00:00.0		2020-04-03 00:00:00.0	075-02	37	0	HCW	999. Unknown		0
597	89	33	1	2020-03-21	10.1186	2020-03-25 00:00:00.0	8.71517	2020-03-28 00:00:00.0		2020-04-01 00:00:00.0	089-02		1	Unknown			0
598	95	46	0	2020-03-21	8.98552	2020-03-25 00:00:00.0	6.49674	2020-03-28 00:00:00.0		2020-04-01 00:00:00.0	095-02						0
599	96	63	1	2020-03-20	8.97681	2020-03-25 00:00:00.0	5.79205	2020-03-28 00:00:00.0		2020-04-01 00:00:00.0	096-02		1	Unknown			0
600	98	44	1	2020-03-23	9.94022	2020-03-25 00:00:00.0	5.96518	2020-03-28 00:00:00.0		2020-04-01 00:00:00.0	098-02						0
601	192	31	0	2020-03-25	10.8109	2020-03-28 00:00:00.0	7.0503	2020-03-31 00:00:00.0		2020-04-04 00:00:00.0	192-02	61	0	Household	1. Always	2020-03-25	0			2020-03-28
602	221	52	1	2020-03-26	9.51837	2020-03-30 00:00:00.0	7.885	2020-04-02 00:00:00.0		2020-04-06 00:00:00.0	221-02	54	1	HCW	0. Never		0
603	266	35	1	2020-03-26	6.94673	2020-04-01 00:00:00.0	5.29905	2020-04-04 00:00:00.0		2020-04-08 00:00:00.0	266-02						0
604	385	30	1	2020-03-31	7.62431	2020-04-04 00:00:00.0	6.96361	2020-04-07 00:00:00.0		2020-04-11 00:00:00.0	385-02						0
605	434	25	1	2020-03-30	9.17055	2020-04-06 00:00:00.0	8.17302	2020-04-09 00:00:00.0		2020-04-13 00:00:00.0	434-02	61	0	Household	999. Unknown		0	2020-04-05 00:00:00.0		2020-04-06
606	451	30	0	2020-04-01	6.72555	2020-04-06 00:00:00.0		2020-04-09 00:00:00.0		2020-04-13 00:00:00.0	451-02		0	HCW	1. Always		0
607	459	61	1	2020-04-02		2020-04-07 00:00:00.0	6.2723	2020-04-10 00:00:00.0	5.5401	2020-04-14 00:00:00.0	459-02	62	0	Household	999. Unknown		0
608	703	42	1	2020-04-15	7.47487	2020-04-18 00:00:00.0	6.65756	2020-04-21 00:00:00.0	4.8614	2020-04-25 00:00:00.0	703-02	60	1	HCW	1. Always	2020-04-14	0
609	51	32	0	2020-03-18	8.8671	2020-03-22 00:00:00.0	7.123	2020-03-25 00:00:00.0		2020-03-29 00:00:00.0	051-03	31	1	HCW	999. Unknown	2020-03-18	0
610	81	24	1	2020-03-21	8.48055	2020-03-25 00:00:00.0	7.88157	2020-03-28 00:00:00.0		2020-04-01 00:00:00.0	081-03						0
611	617	31	1	2020-04-10	7.15395	2020-04-12 00:00:00.0	4.92136	2020-04-15 00:00:00.0		2020-04-19 00:00:00.0	617-02	59	1	Household	999. Unknown	2020-04-07	0
612	51	32	0	2020-03-18	8.8671	2020-03-22 00:00:00.0	7.123	2020-03-25 00:00:00.0		2020-03-29 00:00:00.0	051-04		1	HCW	1. Always	2020-03-18	0
613	91	44	1	2020-03-21	10.106	2020-03-25 00:00:00.0	6.37072	2020-03-28 00:00:00.0		2020-04-01 00:00:00.0	091-04	47					0
614	409	42	0	2020-03-30	5.10974	2020-04-05 00:00:00.0	4.09019	2020-04-08 00:00:00.0		2020-04-12 00:00:00.0	409-06						0
615	451	30	0	2020-04-01	6.72555	2020-04-06 00:00:00.0		2020-04-09 00:00:00.0		2020-04-13 00:00:00.0	451-03	37	1	HCW	999. Unknown	2020-04-01	0
616	456	46	0						4.4418		456-04						0
617	584	54	0	2020-04-10	5.67063	2020-04-11 00:00:00.0	5.63029	2020-04-14 00:00:00.0	4.91521	2020-04-18 00:00:00.0	584-04	32	1	HCW			0
618	676	43	1	2020-04-10	6.0631	2020-04-15 00:00:00.0		2020-04-18 00:00:00.0	4.84406	2020-04-22 00:00:00.0	676-04	52	1	NH	1. Always		0
619	231	30	1	2020-03-25	9.52559	2020-03-30 00:00:00.0	5.73765	2020-04-02 00:00:00.0		2020-04-06 00:00:00.0	231-06	35	1	HCW	999. Unknown	2020-03-27	0
620	584	54	0	2020-04-10	5.67063	2020-04-11 00:00:00.0	5.63029	2020-04-14 00:00:00.0	4.91521	2020-04-18 00:00:00.0	584-06	39	0	HCW			0
621	456	46	0						4.4418		456-07						0
622	200	50	1	2020-03-26		2020-03-28 00:00:00.0	5.11154	2020-03-31 00:00:00.0		2020-04-04 00:00:00.0	200-10	26	0	HCW	1. Always	2020-03-27	0
623	1	37	1	2020-03-11	8.16192	2020-03-19 00:00:00.0	5.28016	2020-03-22 00:00:00.0		2020-03-26 00:00:00.0	001-11	26	1	HCW	999. Unknown	2020-03-11	0
624	555	40	1	2020-04-04		2020-04-09 00:00:00.0	4.8079	2020-04-12 00:00:00.0	4.0757	2020-04-16 00:00:00.0	555-11						0
625	1	37	1	2020-03-11	8.16192	2020-03-19 00:00:00.0	5.28016	2020-03-22 00:00:00.0		2020-03-26 00:00:00.0	001-14	55	1	HCW	999. Unknown	2020-03-12	0
626	1	37	1	2020-03-11	8.16192	2020-03-19 00:00:00.0	5.28016	2020-03-22 00:00:00.0		2020-03-26 00:00:00.0	001-17	40	1	HCW	999. Unknown	2020-03-11	0
627	8	60	0	2020-03-14	6.53954	2020-03-19 00:00:00.0	5.78856	2020-03-22 00:00:00.0		2020-03-26 00:00:00.0	008-02		1	Household	0. Never	2020-03-18	0
628	8	60	0	2020-03-14	6.53954	2020-03-19 00:00:00.0	5.78856	2020-03-22 00:00:00.0		2020-03-26 00:00:00.0	008-03	18	0	Household	0. Never	2020-03-18	0
629	8	60	0	2020-03-14	6.53954	2020-03-19 00:00:00.0	5.78856	2020-03-22 00:00:00.0		2020-03-26 00:00:00.0	008-05		1	HCW	1. Always	2020-03-15	0
630	8	60	0	2020-03-14	6.53954	2020-03-19 00:00:00.0	5.78856	2020-03-22 00:00:00.0		2020-03-26 00:00:00.0	008-06		1	HCW	1. Always	2020-03-15	0
631	8	60	0	2020-03-14	6.53954	2020-03-19 00:00:00.0	5.78856	2020-03-22 00:00:00.0		2020-03-26 00:00:00.0	008-09		0	HCW	999. Unknown		0
632	12	62	1	2020-03-14	7.9895	2020-03-19 00:00:00.0	5.49905	2020-03-22 00:00:00.0		2020-03-26 00:00:00.0	012-01	53	1	HCW	1. Always	2020-03-16	0
633	12	62	1	2020-03-14	7.9895	2020-03-19 00:00:00.0	5.49905	2020-03-22 00:00:00.0		2020-03-26 00:00:00.0	012-02	38	1	HCW	1. Always	2020-04-16	0
634	12	62	1	2020-03-14	7.9895	2020-03-19 00:00:00.0	5.49905	2020-03-22 00:00:00.0		2020-03-26 00:00:00.0	012-03	36	1	HCW	1. Always	2020-03-16	0
635	12	62	1	2020-03-14	7.9895	2020-03-19 00:00:00.0	5.49905	2020-03-22 00:00:00.0		2020-03-26 00:00:00.0	012-05	56	1	HCW	1. Always	2020-03-16	0
636	13	51	1		8.35027	2020-03-19 00:00:00.0	5.81258	2020-03-22 00:00:00.0		2020-03-26 00:00:00.0	013-05	62	0	HCW	1. Always		0
637	13	51	1		8.35027	2020-03-19 00:00:00.0	5.81258	2020-03-22 00:00:00.0		2020-03-26 00:00:00.0	013-06	54	0	HCW	1. Always		0
638	14	45	1	2020-03-15	5.43402	2020-03-20 00:00:00.0	7.30994	2020-03-23 00:00:00.0		2020-03-27 00:00:00.0	014-03	32	1	Unknown	999. Unknown		0
639	14	45	1	2020-03-15	5.43402	2020-03-20 00:00:00.0	7.30994	2020-03-23 00:00:00.0		2020-03-27 00:00:00.0	014-04	43	1	Unknown	999. Unknown		0
640	16	20	0		9.50421	2020-03-19 00:00:00.0	4.75593	2020-03-22 00:00:00.0		2020-03-26 00:00:00.0	016-02	57	0	Household	999. Unknown	2020-03-14	0
641	16	20	0		9.50421	2020-03-19 00:00:00.0	4.75593	2020-03-22 00:00:00.0		2020-03-26 00:00:00.0	016-03	54	1	Household	999. Unknown	2020-03-14	0
642	27	41	1	2020-03-16	7.77452	2020-03-21 00:00:00.0	6.13975	2020-03-24 00:00:00.0		2020-03-28 00:00:00.0	027-01	65	1	Unknown			0
643	27	41	1	2020-03-16	7.77452	2020-03-21 00:00:00.0	6.13975	2020-03-24 00:00:00.0		2020-03-28 00:00:00.0	027-03			Unknown			0
644	29	51	0	2020-03-16	8.70254	2020-03-21 00:00:00.0		2020-03-24 00:00:00.0		2020-03-29 00:00:00.0	029-03						0
645	29	51	0	2020-03-16	8.70254	2020-03-21 00:00:00.0		2020-03-24 00:00:00.0		2020-03-29 00:00:00.0	029-04						0
646	33	31	1	2020-03-16	8.86343	2020-03-21 00:00:00.0	5.2992	2020-03-26 00:00:00.0		2020-03-28 00:00:00.0	033-01		0	Unknown	999. Unknown		0
647	33	31	1	2020-03-16	8.86343	2020-03-21 00:00:00.0	5.2992	2020-03-26 00:00:00.0		2020-03-28 00:00:00.0	033-02		1	Unknown	999. Unknown		0
648	35	48	0	2020-03-14	9.21919	2020-03-21 00:00:00.0	5.82751	2020-03-26 00:00:00.0		2020-03-28 00:00:00.0	035-02		0	HCW	1. Always		0
649	35	48	0	2020-03-14	9.21919	2020-03-21 00:00:00.0	5.82751	2020-03-26 00:00:00.0		2020-03-28 00:00:00.0	035-04		0	HCW	1. Always	2020-03-18	0
650	43	46	1	2020-03-15	8.51832	2020-03-22 00:00:00.0	6.25957	2020-03-30 00:00:00.0		2020-03-29 00:00:00.0	043-04		1	Unknown	999. Unknown		0
651	43	46	1	2020-03-15	8.51832	2020-03-22 00:00:00.0	6.25957	2020-03-30 00:00:00.0		2020-03-29 00:00:00.0	043-05		0	Unknown	999. Unknown		0
652	44	53	1	2020-03-16	9.42449	2020-03-22 00:00:00.0	7.65574	2020-03-25 00:00:00.0		2020-03-29 00:00:00.0	044-02	21	0	Unknown	999. Unknown		0
653	47	40	0	2020-03-18	8.835	2020-03-22 00:00:00.0					047-05						0
654	51	32	0	2020-03-18	8.8671	2020-03-22 00:00:00.0	7.123	2020-03-25 00:00:00.0		2020-03-29 00:00:00.0	051-05		1	Household	999. Unknown	2020-03-18	0
655	53	39	1	2020-03-17	9.15631	2020-03-23 00:00:00.0	8.08562	2020-03-26 00:00:00.0		2020-03-30 00:00:00.0	053-01	39	0	Household	0. Never		0
656	53	39	1	2020-03-17	9.15631	2020-03-23 00:00:00.0	8.08562	2020-03-26 00:00:00.0		2020-03-30 00:00:00.0	053-03	57	1	HCW	1. Always		0
657	53	39	1	2020-03-17	9.15631	2020-03-23 00:00:00.0	8.08562	2020-03-26 00:00:00.0		2020-03-30 00:00:00.0	053-04		1	HCW	999. Unknown		0
658	53	39	1	2020-03-17	9.15631	2020-03-23 00:00:00.0	8.08562	2020-03-26 00:00:00.0		2020-03-30 00:00:00.0	053-06		1	Unknown	999. Unknown		0
659	53	39	1	2020-03-17	9.15631	2020-03-23 00:00:00.0	8.08562	2020-03-26 00:00:00.0		2020-03-30 00:00:00.0	053-08	51	1	Unknown	999. Unknown		0
660	57	54	1	2020-03-17	10.0533	2020-03-22 00:00:00.0	8.85833	2020-03-25 00:00:00.0		2020-03-29 00:00:00.0	057-03	56	0	Household	999. Unknown	2020-03-18	0
661	58	55	1	2020-03-18	9.32997	2020-03-23 00:00:00.0	8.3213	2020-03-26 00:00:00.0		2020-03-30 00:00:00.0	058-03	54	1	HCW	999. Unknown	2020-03-17	0
662	60	50	1	2020-03-20	8.835	2020-03-23 00:00:00.0					060-03		1	HCW			0
663	60	50	1	2020-03-20	8.835	2020-03-23 00:00:00.0					060-04		0	Unknown			0
664	61	25	1	2020-03-17	8.10557	2020-03-23 00:00:00.0	4.47334	2020-03-26 00:00:00.0		2020-03-30 00:00:00.0	061-02		0	Unknown			0
665	63	19	0	2020-03-19	8.15082	2020-03-23 00:00:00.0	5.7407	2020-03-26 00:00:00.0		2020-03-30 00:00:00.0	063-03	55	0	Household	999. Unknown	2020-03-19	0
666	65	60	1	2020-03-19	9.03013	2020-03-24 00:00:00.0	7.50376	2020-03-27 00:00:00.0		2020-03-31 00:00:00.0	065-03	84	0	Household	999. Unknown	2020-03-23	0
667	68	53	1	2020-03-17	4.31514	2020-03-24 00:00:00.0	4.46756	2020-03-27 00:00:00.0		2020-03-31 00:00:00.0	068-01						0
668	68	53	1	2020-03-17	4.31514	2020-03-24 00:00:00.0	4.46756	2020-03-27 00:00:00.0		2020-03-31 00:00:00.0	068-03						0
669	69	48	0	2020-03-19	7.3706	2020-03-24 00:00:00.0					069-01						0
670	69	48	0	2020-03-19	7.3706	2020-03-24 00:00:00.0					069-02						0
671	71	45	1	2020-03-20	7.9776	2020-03-24 00:00:00.0	6.78029	2020-03-27 00:00:00.0		2020-03-31 00:00:00.0	071-04		1	NH			0
672	71	45	1	2020-03-20	7.9776	2020-03-24 00:00:00.0	6.78029	2020-03-27 00:00:00.0		2020-03-31 00:00:00.0	071-09		1	NH			0
673	89	33	1	2020-03-21	10.1186	2020-03-25 00:00:00.0	8.71517	2020-03-28 00:00:00.0		2020-04-01 00:00:00.0	089-03		1				0
674	95	46	0	2020-03-21	8.98552	2020-03-25 00:00:00.0	6.49674	2020-03-28 00:00:00.0		2020-04-01 00:00:00.0	095-04						0
675	95	46	0	2020-03-21	8.98552	2020-03-25 00:00:00.0	6.49674	2020-03-28 00:00:00.0		2020-04-01 00:00:00.0	095-05		1	HCW			0
676	95	46	0	2020-03-21	8.98552	2020-03-25 00:00:00.0	6.49674	2020-03-28 00:00:00.0		2020-04-01 00:00:00.0	095-06		1	HCW			0
677	95	46	0	2020-03-21	8.98552	2020-03-25 00:00:00.0	6.49674	2020-03-28 00:00:00.0		2020-04-01 00:00:00.0	095-08						0
678	129	52	1	2020-03-20	8.65794	2020-03-26 00:00:00.0	7.66063	2020-03-29 00:00:00.0			129-03						0
679	129	52	1	2020-03-20	8.65794	2020-03-26 00:00:00.0	7.66063	2020-03-29 00:00:00.0			129-04		0	Unknown		2020-03-25	0
680	129	52	1	2020-03-20	8.65794	2020-03-26 00:00:00.0	7.66063	2020-03-29 00:00:00.0			129-05						0
681	129	52	1	2020-03-20	8.65794	2020-03-26 00:00:00.0	7.66063	2020-03-29 00:00:00.0			129-06						0
682	132	31	1	2020-03-22	9.45506	2020-03-26 00:00:00.0	7.93782	2020-03-29 00:00:00.0		2020-04-02 00:00:00.0	132-02						0
683	132	31	1	2020-03-22	9.45506	2020-03-26 00:00:00.0	7.93782	2020-03-29 00:00:00.0		2020-04-02 00:00:00.0	132-03						0
684	132	31	1	2020-03-22	9.45506	2020-03-26 00:00:00.0	7.93782	2020-03-29 00:00:00.0		2020-04-02 00:00:00.0	132-04						0
685	133	39	0	2020-03-22	9.45291	2020-03-26 00:00:00.0	7.67037	2020-03-29 00:00:00.0		2020-04-02 00:00:00.0	133-01		1	Unknown			0
686	133	39	0	2020-03-22	9.45291	2020-03-26 00:00:00.0	7.67037	2020-03-29 00:00:00.0		2020-04-02 00:00:00.0	133-02						0
687	174	40	1	2020-03-24	5.57383	2020-03-28 00:00:00.0	4.48277	2020-03-31 00:00:00.0		2020-04-04 00:00:00.0	174-01		1	Household			0
688	174	40	1	2020-03-24	5.57383	2020-03-28 00:00:00.0	4.48277	2020-03-31 00:00:00.0		2020-04-04 00:00:00.0	174-02		0	Unknown			0
689	178	41	1	2020-03-27	9.09032	2020-03-29 00:00:00.0	7.62147	2020-04-01 00:00:00.0		2020-04-04 00:00:00.0	178-02		1	Household			0
690	179	74	1		7.0045						179-02	49	1	HCW			0
691	179	74	1		7.0045						179-03						0
692	180	40	1	2020-03-25	11.3142	2020-03-28 00:00:00.0	8.9899	2020-03-31 00:00:00.0		2020-04-04 00:00:00.0	180-02	29	0	HCW	999. Unknown		0
693	180	40	1	2020-03-25	11.3142	2020-03-28 00:00:00.0	8.9899	2020-03-31 00:00:00.0		2020-04-04 00:00:00.0	180-03	49	0	HCW	999. Unknown		0
694	184	35	1	2020-03-25	9.21	2020-03-28 00:00:00.0	7.60542	2020-03-31 00:00:00.0		2020-04-04 00:00:00.0	184-01						0
695	184	35	1	2020-03-25	9.21	2020-03-28 00:00:00.0	7.60542	2020-03-31 00:00:00.0		2020-04-04 00:00:00.0	184-02						0
696	184	35	1	2020-03-25	9.21	2020-03-28 00:00:00.0	7.60542	2020-03-31 00:00:00.0		2020-04-04 00:00:00.0	184-03						0
697	184	35	1	2020-03-25	9.21	2020-03-28 00:00:00.0	7.60542	2020-03-31 00:00:00.0		2020-04-04 00:00:00.0	184-04	23	1	HCW			0
698	184	35	1	2020-03-25	9.21	2020-03-28 00:00:00.0	7.60542	2020-03-31 00:00:00.0		2020-04-04 00:00:00.0	184-05						0
699	203	39	0	2020-03-25	6.59772	2020-03-29 00:00:00.0	4.92372	2020-04-01 00:00:00.0		2020-04-05 00:00:00.0	203-02						0
700	203	39	0	2020-03-25	6.59772	2020-03-29 00:00:00.0	4.92372	2020-04-01 00:00:00.0		2020-04-05 00:00:00.0	203-04		0	Household			0
701	204	39	1	2020-03-27	6.89093	2020-03-29 00:00:00.0	5.64489	2020-04-01 00:00:00.0		2020-04-05 00:00:00.0	204-02						0
702	204	39	1	2020-03-27	6.89093	2020-03-29 00:00:00.0	5.64489	2020-04-01 00:00:00.0		2020-04-05 00:00:00.0	204-03						0
703	204	39	1	2020-03-27	6.89093	2020-03-29 00:00:00.0	5.64489	2020-04-01 00:00:00.0		2020-04-05 00:00:00.0	204-04						0
704	211	31	0	2020-03-26	8.42939	2020-03-29 00:00:00.0	6.69183	2020-04-01 00:00:00.0		2020-04-05 00:00:00.0	211-02	34	1	Household	999. Unknown	2020-03-25	0
705	211	31	0	2020-03-26	8.42939	2020-03-29 00:00:00.0	6.69183	2020-04-01 00:00:00.0		2020-04-05 00:00:00.0	211-03		0	Household	999. Unknown	2020-03-25	0
706	215	22	1	2020-03-24	6.62501	2020-03-30 00:00:00.0	6.1226	2020-04-02 00:00:00.0		2020-04-06 00:00:00.0	215-01	52	1	Household			0
707	215	22	1	2020-03-24	6.62501	2020-03-30 00:00:00.0	6.1226	2020-04-02 00:00:00.0		2020-04-06 00:00:00.0	215-02	58	0	Household			0
708	222	49	1	2020-03-26	9.02434	2020-03-30 00:00:00.0	6.57384	2020-04-02 00:00:00.0		2020-04-06 00:00:00.0	222-04		1	HCW	999. Unknown		0
709	222	49	1	2020-03-26	9.02434	2020-03-30 00:00:00.0	6.57384	2020-04-02 00:00:00.0		2020-04-06 00:00:00.0	222-05		1		999. Unknown	2020-03-19	0
710	224	28	0	2020-03-27	8.64991	2020-03-30 00:00:00.0	6.80609	2020-04-02 00:00:00.0		2020-04-06 00:00:00.0	224-01						0
711	228	50	0			2020-03-30 00:00:00.0		2020-04-02 00:00:00.0		2020-04-06 00:00:00.0	228-02						0
712	231	30	1	2020-03-25	9.52559	2020-03-30 00:00:00.0	5.73765	2020-04-02 00:00:00.0		2020-04-06 00:00:00.0	231-07						0
713	234	23	1	2020-03-23	8.09139	2020-03-30 00:00:00.0	6.90889	2020-04-02 00:00:00.0		2020-04-06 00:00:00.0	234-01						0
714	254	30	0	2020-03-27	8.39842	2020-03-31 00:00:00.0	6.63179	2020-04-04 00:00:00.0		2020-04-07 00:00:00.0	254-02		1				0
715	254	30	0	2020-03-27	8.39842	2020-03-31 00:00:00.0	6.63179	2020-04-04 00:00:00.0		2020-04-07 00:00:00.0	254-03		0				0
716	255	43	1	2020-03-27		2020-03-31 00:00:00.0	4.8079	2020-04-03 00:00:00.0		2020-04-07 00:00:00.0	255-01						0
717	265	64	1	2020-03-28	6.5644	2020-04-01 00:00:00.0	5.24052	2020-04-03 00:00:00.0		2020-04-08 00:00:00.0	265-04	92	0	Household	0. Never	2020-03-28	0
718	266	35	1	2020-03-26	6.94673	2020-04-01 00:00:00.0	5.29905	2020-04-04 00:00:00.0		2020-04-08 00:00:00.0	266-04		1	HCW			0
719	266	35	1	2020-03-26	6.94673	2020-04-01 00:00:00.0	5.29905	2020-04-04 00:00:00.0		2020-04-08 00:00:00.0	266-05		1	HCW			0
720	266	35	1	2020-03-26	6.94673	2020-04-01 00:00:00.0	5.29905	2020-04-04 00:00:00.0		2020-04-08 00:00:00.0	266-10						0
721	266	35	1	2020-03-26	6.94673	2020-04-01 00:00:00.0	5.29905	2020-04-04 00:00:00.0		2020-04-08 00:00:00.0	266-12						0
722	276	53	0	2020-03-30	10.0873	2020-04-01 00:00:00.0	6.75928	2020-04-04 00:00:00.0		2020-04-08 00:00:00.0	276-02	18	0	Household	999. Unknown	2020-03-29	0
723	276	53	0	2020-03-30	10.0873	2020-04-01 00:00:00.0	6.75928	2020-04-04 00:00:00.0		2020-04-08 00:00:00.0	276-03	21	0	Household	999. Unknown	2020-03-29	0
724	278	26	1	2020-03-27	7.33996	2020-04-01 00:00:00.0	9.73036	2020-04-04 00:00:00.0		2020-04-09 00:00:00.0	278-02						0
725	296	46	1	2020-03-28	9.84871	2020-04-02 00:00:00.0	6.81952	2020-04-05 00:00:00.0		2020-04-09 00:00:00.0	296-02	28	0				0
726	305	51	1	2020-03-30	7.0045	2020-04-02 00:00:00.0	7.3706	2020-04-05 00:00:00.0		2020-04-09 00:00:00.0	305-03	93	1	Household	999. Unknown		0
727	312	37	0	2020-03-29	7.90085	2020-04-02 00:00:00.0	7.20955	2020-04-05 00:00:00.0			312-03						0
728	327	44	1	2020-03-31	9.18556	2020-04-03 00:00:00.0	7.54186	2020-04-06 00:00:00.0		2020-04-09 00:00:00.0	327-02						0
729	327	44	1	2020-03-31	9.18556	2020-04-03 00:00:00.0	7.54186	2020-04-06 00:00:00.0		2020-04-09 00:00:00.0	327-05						0
730	327	44	1	2020-03-31	9.18556	2020-04-03 00:00:00.0	7.54186	2020-04-06 00:00:00.0		2020-04-09 00:00:00.0	327-06						0
731	368	54	1	2020-03-31	5.16728	2020-04-04 00:00:00.0	4.73033	2020-04-07 00:00:00.0		2020-04-11 00:00:00.0	368-03	21	1	HCW	999. Unknown		0
732	396	60	1	2020-03-30	6.53218	2020-04-05 00:00:00.0	5.36092	2020-04-08 00:00:00.0		2020-04-12 00:00:00.0	396-03	25	0	Household	999. Unknown		0
733	409	42	0	2020-03-30	5.10974	2020-04-05 00:00:00.0	4.09019	2020-04-08 00:00:00.0		2020-04-12 00:00:00.0	409-03						0
734	409	42	0	2020-03-30	5.10974	2020-04-05 00:00:00.0	4.09019	2020-04-08 00:00:00.0		2020-04-12 00:00:00.0	409-08						0
735	409	42	0	2020-03-30	5.10974	2020-04-05 00:00:00.0	4.09019	2020-04-08 00:00:00.0		2020-04-12 00:00:00.0	409-10						0
736	409	42	0	2020-03-30	5.10974	2020-04-05 00:00:00.0	4.09019	2020-04-08 00:00:00.0		2020-04-12 00:00:00.0	409-11						0
737	409	42	0	2020-03-30	5.10974	2020-04-05 00:00:00.0	4.09019	2020-04-08 00:00:00.0		2020-04-12 00:00:00.0	409-12						0
738	409	42	0	2020-03-30	5.10974	2020-04-05 00:00:00.0	4.09019	2020-04-08 00:00:00.0		2020-04-12 00:00:00.0	409-15						0
739	409	42	0	2020-03-30	5.10974	2020-04-05 00:00:00.0	4.09019	2020-04-08 00:00:00.0		2020-04-12 00:00:00.0	409-16						0
740	409	42	0	2020-03-30	5.10974	2020-04-05 00:00:00.0	4.09019	2020-04-08 00:00:00.0		2020-04-12 00:00:00.0	409-17						0
741	440	52	0	2020-04-02	9.07161	2020-04-06 00:00:00.0	7.13535	2020-04-09 00:00:00.0		2020-04-13 00:00:00.0	440-04						0
742	440	52	0	2020-04-02	9.07161	2020-04-06 00:00:00.0	7.13535	2020-04-09 00:00:00.0		2020-04-13 00:00:00.0	440-06						0
743	440	52	0	2020-04-02	9.07161	2020-04-06 00:00:00.0	7.13535	2020-04-09 00:00:00.0		2020-04-13 00:00:00.0	440-07						0
744	462	50	1	2020-04-02	9.82184	2020-04-07 00:00:00.0	8.25163	2020-04-10 00:00:00.0	6.6384	2020-04-14 00:00:00.0	462-03	51	0	HCW	999. Unknown	2020-04-02	0
745	506	38	1	2020-04-04	6.35478	2020-04-08 00:00:00.0		2020-04-11 00:00:00.0	4.2176	2020-04-15 00:00:00.0	506-02						0
746	542	26	0	2020-04-07	8.4689	2020-04-09 00:00:00.0	6.6384	2020-04-12 00:00:00.0	4.4418	2020-04-16 00:00:00.0	542-02						0
747	545	42	1	2020-04-06	9.8685	2020-04-09 00:00:00.0	8.77066	2020-04-12 00:00:00.0	6.15684	2020-04-16 00:00:00.0	545-03						0
748	560	51	0	2020-04-05	9.31332	2020-04-10 00:00:00.0	7.28481	2020-04-13 00:00:00.0	6.7966	2020-04-17 00:00:00.0	560-03	18	1	HCW	1. Always	2020-04-06	0
749	562	39	1	2020-04-06		2020-04-10 00:00:00.0		2020-04-13 00:00:00.0		2020-04-17 00:00:00.0	562-03	33	1	Household	1. Always	2020-04-06	0
750	731	25	1	2020-04-15	7.91311	2020-04-20 00:00:00.0	5.917	2020-04-23 00:00:00.0		2020-04-27 00:00:00.0	731-02	34	0	Household	0. Never	2020-04-15	0
751	743	48	1	2020-04-17	5.50693	2020-04-21 00:00:00.0	5.13886	2020-04-24 00:00:00.0		2020-04-28 00:00:00.0	743-02		1	HCW	999. Unknown	2020-04-18	0
752	743	48	1	2020-04-17	5.50693	2020-04-21 00:00:00.0	5.13886	2020-04-24 00:00:00.0		2020-04-28 00:00:00.0	743-03		1	HCW	999. Unknown	2020-04-14	0
753	746	32	1	2020-04-17	6.2723	2020-04-22 00:00:00.0		2020-04-25 00:00:00.0		2020-04-29 00:00:00.0	746-02	68	0	Household	999. Unknown	2020-04-17	0
