# Supplementary material for: Quantifying the relationship between SARS-CoV-2 viral load and infectiousness
Source: eLife. 2021 Sep 27;10:e69302. doi: 10.7554/eLife.69302 (PMC8476126; doi:10.7554/eLife.69302)
Supplement: Supplementary file 1. [file elife-69302-supp1.docx]

|  | Parameter estimates (RSE %) | | | | | | | |
| --- | --- | --- | --- | --- | --- | --- | --- | --- |
|  | Models with a fixed incubation period | | | | | | | |
|  | Incubation period = 4 days | | Incubation period = 5 days | | Incubation period = 6 days | | Incubation period = 7 days | |
|  | Fixed effect | Random effect SD | Fixed effect | Random effect SD | Fixed effect | Random effect SD | Fixed effect | Random effect SD |
|  | 28 (34) | 0.185 (71) |  |  | 23.1 (35) | 0.231 (61) | 23 (29) | 0.17 (97) |
|  | 0.86 (3) | 0.0254 (55) |  |  | 0.85 (4) | 0.034 (29) | 0.86 (4.8) | 0.0329 (62) |
| ( | (43) | 2.7 (7) |  |  | (87) | 2.67 (8.02) | (54) | 2.68 (7.8) |
|  | 0.38 (28) | 0.94 (40) | 0.38 (20) | 0.98 (28) | 0.38 (19) | 0.86 (30) | 0.37 (20) | 0.87 (30) |
|  | 0.16 (61) | 0.16 (43) | 0.17 (41) | 0.16 (42) |

Supplementary Table 1. Parameter estimates of models with a fixed incubation period ranging from 4 to 7 days.
