# Supplementary material for: Quantifying the relationship between SARS-CoV-2 viral load and infectiousness
Source: eLife. 2021 Sep 27;10:e69302. doi: 10.7554/eLife.69302 (PMC8476126; doi:10.7554/eLife.69302)
Supplement: Supplementary file 3. [file elife-69302-supp3.docx]

Supplementary Table 3: Parameters estimates of the Model M2 (left) and the same model without variability in transmission (Right).

|  | Parameter estimates (RSE%) | | | |
| --- | --- | --- | --- | --- |
|  | Logit-Linear (M2) | | Model without variability | |
|  | Fixed effect | Random effect SD | Fixed effect | Random effect SD |
|  |  |  | 11 (18) | 0.376 (24) |
|  |  |  | 0.87 (1.7) | 0.0342 (32.4) |
| ( |  |  | (54) | 2.45 (8.28) |
|  | 0.49 (20) |  | 0.712 (13.6) |  |
|  | 0.21 (44) | 0.39 (22.4) |
| -2 x log-likelihood | 2432 | | 2443 | |
